# Supplementary material for: Metal-mediated rearrangement of 1,2-diphenylhydrazine to ortho-semidine upon reaction with dichlorotris(triphenylphosphine)ruthenium(ii)
Source: Royal Society of Chemistry journal article supplement (doi:10.1039/d2cc04500a), 2022-01-01
Supplement: d2cc04500a1.pdf [file d2cc04500a1.pdf]

## Supporting Information

### Metal-mediated rearrangement of 1,2-diphenylhydrazine to *ortho*-semidine upon reaction with dichlorotris(triphenylphosphine)ruthenium(II)

Nicolas Cena,<sup>a</sup> Andrew Peloquin,<sup>b</sup> Jerry A. Boatz,<sup>c</sup> Sarah Costa,<sup>d</sup> Steven R. Gralinski,<sup>d</sup> Alan L. Balch,<sup>d,\*</sup> Kamran B. Ghiassi<sup>c,\*</sup>

<sup>a</sup> HX5, LLC, Air Force Research Laboratory, Aerospace Systems Directorate, Edwards AFB, California 93524, United States

<sup>b</sup> Department of Chemistry and Chemistry Research Center, Laboratories for Advanced Materials, United States Air Force Academy, Colorado Springs, Colorado 80840, United States

<sup>c</sup> Air Force Research Laboratory, Aerospace Systems Directorate, Edwards AFB, California 93524, United States

<sup>d</sup> Department of Chemistry, University of California, Davis, 95616, United States

#### Table of Contents

1. General considerations, materials, and methods
2. Synthesis
3. NMR spectra
4. FTIR spectrum
5. UV-vis data
6. Single crystal X-ray diffraction and data
7. PXRD diffractograms
8. DFT numbering scheme, data, and coordinates
9. References

## 1. General considerations, materials, and methods

### General Considerations and Materials

All reactions and manipulations were performed under anaerobic conditions employing either a nitrogen-filled glove box or standard Schlenk techniques.  $\text{RuCl}_2(\text{PPh}_3)_3$  was prepared according to literature methods.<sup>1</sup> 2-aminodiphenylamine (*ortho*-semidine) was purchased from Sigma-Aldrich and used as received. 1,2-Diphenylhydrazine was purchased from TCI America and used as received. Solvents were obtained commercially, degassed, dried, and stored over molecular sieves or passed through a solvent purification system.

### Physical Measurements

NMR data were obtained on a Bruker Avance III HD 400 MHz spectrometer.  $^1\text{H}$  and  $^{13}\text{C}\{^1\text{H}\}$  spectra were recorded in  $\text{CDCl}_3$  and referenced internally to residual solvent.  $^{31}\text{P}\{^1\text{H}\}$  spectra were referenced externally to 85%  $\text{H}_3\text{PO}_4$  in  $\text{D}_2\text{O}$ . FTIR data were obtained on a Thermo Nicolet iS50 equipped with an ATR accessory with the following instrument parameters: 32 scans, 525-4000  $\text{cm}^{-1}$  range, 4  $\text{cm}^{-1}$  resolution. UV-vis data were collected on a Shimadzu 3101PC spectrophotometer using dichloromethane as solvent and a 1 cm cuvette at 25 °C under inert conditions. Melting points were obtained on a Stanford Research Systems MPA100 automated melting point system at a heating rate of 2 °C  $\text{min}^{-1}$ .

### Computational Methods

The structures and gas-phase relative Gibbs free energies of reactants and products were calculated using density functional theory (DFT) methods. All calculations were performed using the PBE0 hybrid functional,<sup>2</sup> paired with the def2-TZVPPD basis set<sup>3,4</sup> for all atoms and the Stuttgart quasi-relativistic pseudopotential<sup>5</sup> for ruthenium.<sup>6-9</sup> All molecular structures were fully optimized and confirmed as local minima or first-order transition states via diagonalization of the mass-weighted energy second derivatives with respect to nuclear coordinates (*i.e.* the Hessian matrix). Relative Gibbs free energies at 298.15 K were calculated at all stationary points, with thermal and entropic corrections obtained from standard rigid-rotor, harmonic oscillator approximations,<sup>10</sup> using unscaled harmonic vibrational frequencies. All calculations were performed using the GAMESS quantum chemistry program.<sup>11-13</sup> The structures of **1** and **1b-1g** were reoptimized using the Solvation Model Density (SMD) method<sup>14</sup> implemented within the Polarizable Continuum Model (PCM)<sup>15,16</sup> to capture effects of solvation in chloroform,  $\text{CHCl}_3$ . In addition, the structures of **1** and **1g** were optimized using SMD/PCM with toluene as the solvent. Relative free energies in solution were approximated by combining SMD/PCM relative electronic energies with the gas phase zero point, thermal, and entropic corrections.

### Single-Crystal X-ray Diffraction

Crystals of  $\alpha$ -**1** and  $\beta$ -**1** were grown as outlined below under inert atmosphere. Once obtained, the crystals were removed from the mother liquor, submersed in an inert oil, and examined microscopically. A suitable crystal was then placed in the 100 K nitrogen cold

stream provided by an Oxford Cryosystems Industries low-temperature apparatus on the goniometer head of a Bruker Apex II diffractometer equipped with a CCD detector and Mo K $\alpha$  radiation ( $\lambda = 0.71073 \text{ \AA}$ ) from a fine-focus sealed tube. All data sets were reduced using Bruker SAINT, and a multi-scan absorption correction was applied using SADABS.<sup>17</sup> Structure solution and refinement were conducted employing SHELXT-2015 and SHELXL-2018, respectively.<sup>18,19</sup> CCDC 2201044 and 2201045 contain the supplementary crystallographic data for this paper. These data can be obtained free of charge via [www.ccdc.cam.ac.uk/data\\_request/cif](http://www.ccdc.cam.ac.uk/data_request/cif), or by emailing [data\\_request@ccdc.cam.ac.uk](mailto:data_request@ccdc.cam.ac.uk), or by contacting The Cambridge Crystallographic Data Centre, 12 Union Road, Cambridge CB2 1EZ, UK; fax: +44 1223 336033.

#### Powder X-ray Diffraction

Powder samples were analyzed at room temperature using a Bruker D8 ADVANCE ECO equipped with a Cu-K $\alpha$  ( $\lambda = 1.5418 \text{ \AA}$ ) and a LYNXEYE compound silicon strip detector, and Soller slits and a Nickel K $\beta$  filter. Samples were prepared by grinding the material into a fine powder form. To run samples in an air-free environment sample was plated between double-sided Kapton® tape and Kapton® film on a poly(methyl methacrylate) (PMMA) sample holder. Data acquisition was conducted while rotating the sample at 30 rpm, and the pattern was acquired from 5–105°  $2\theta$  at 2.0°  $2\theta \text{ min}^{-1}$ , with an integration step size of 0.01°  $2\theta$ .

## 2. Synthesis

### RuCl<sub>2</sub>(PPh<sub>3</sub>)<sub>2</sub>(κ<sup>2</sup>-NH<sub>2</sub>-1,2-C<sub>6</sub>H<sub>4</sub>-NHPPh) (1)

*Method 1:* A 50 mL flask equipped with a stir bar was charged with RuCl<sub>2</sub>(PPh<sub>3</sub>)<sub>3</sub> (200 mg, 0.209 mmol) and 1,2-diphenylhydrazine (46 mg, 0.25 mmol). Toluene (15 mL) was added, producing an orange solution. The solution was allowed to stir overnight. The solvent was removed *in vacuo* and the crude solid was suspended in Et<sub>2</sub>O (10 mL), filtered, and washed with additional Et<sub>2</sub>O (2 x 5 mL) to produce the orange solid product (141 mg, 76%). Single crystals (orange blocks) suitable for X-ray diffraction were obtained by vapor diffusion of pentane into a toluene solution. Mp: 89 °C (decomp.). <sup>1</sup>H NMR (400 MHz, CDCl<sub>3</sub>): δ 7.43 (b, 12H, Ar CH), 7.28 (t, 6H, Ar CH, *J* = 7.2 Hz), 7.09 (t, 14H, Ar CH, *J* = 7.5 Hz), 6.93 (m, 6H, Ar CH and NH), 6.14 (b, 2H, Ar CH), 4.70 (b, 2H, NH<sub>2</sub>). <sup>13</sup>C{<sup>1</sup>H} NMR (101 MHz, CDCl<sub>3</sub>, 298 K): δ 147.17, 139.98, 135.42, 135.09, 135.05, 135.00, 129.24, 128.51, 127.61, 127.57, 127.52, 127.01, 126.84, 124.19 ppm. <sup>31</sup>P{<sup>1</sup>H} NMR (162 MHz, CDCl<sub>3</sub>, 298 K): δ 44.3 ppm. <sup>31</sup>P{<sup>1</sup>H} NMR (162 MHz, CDCl<sub>3</sub>, 218 K): δ 48.0 ppm (<sup>2</sup>*J*<sub>P,P</sub> = 37 Hz), 38.2 ppm (<sup>2</sup>*J*<sub>P,P</sub> = 37 Hz). FTIR (cm<sup>-1</sup>): 3304w (v, N-H), 3247w (v, N-H), 3051w (v, C-H), 2227w, 1979w, 1617w, 1594w, 1572w, 1535w, 1493m, 1481m, 1469w, 1432m, 1366w, 1313w, 1269w, 1230w, 1191w, 1157w, 1114w, 1087m, 1050w, 1029w, 907m, 856w, 727s, 692s, 645w, 584w. UV/vis [chloroform; λ<sub>max</sub>, nm (ε, M<sup>-1</sup> cm<sup>-1</sup>): 492 (3470). Elemental analysis: element (theoretical, found) C (65.46, 65.11), H (4.81, 4.89), N (3.18, 3.39).

*Method 2:* A 50 mL flask equipped with a stir bar was charged with RuCl<sub>2</sub>(PPh<sub>3</sub>)<sub>3</sub> (200 mg, 0.209 mmol) and toluene (5 mL) producing a dark red solution. A separate 50 mL flask equipped with a stir bar was charged with *ortho*-semidine (46 mg, 0.25 mmol) and toluene (5 mL) forming a dark brown solution. The mixtures were combined forming a brown solution that turns orange over the course of hours. The solution was allowed to stir overnight. The solvent was removed *in vacuo* and the crude solid was suspended in Et<sub>2</sub>O (10 mL), filtered, and washed with additional Et<sub>2</sub>O (2 x 5 mL) to produce the orange solid product (131 mg, 71%).

### 3. NMR spectra

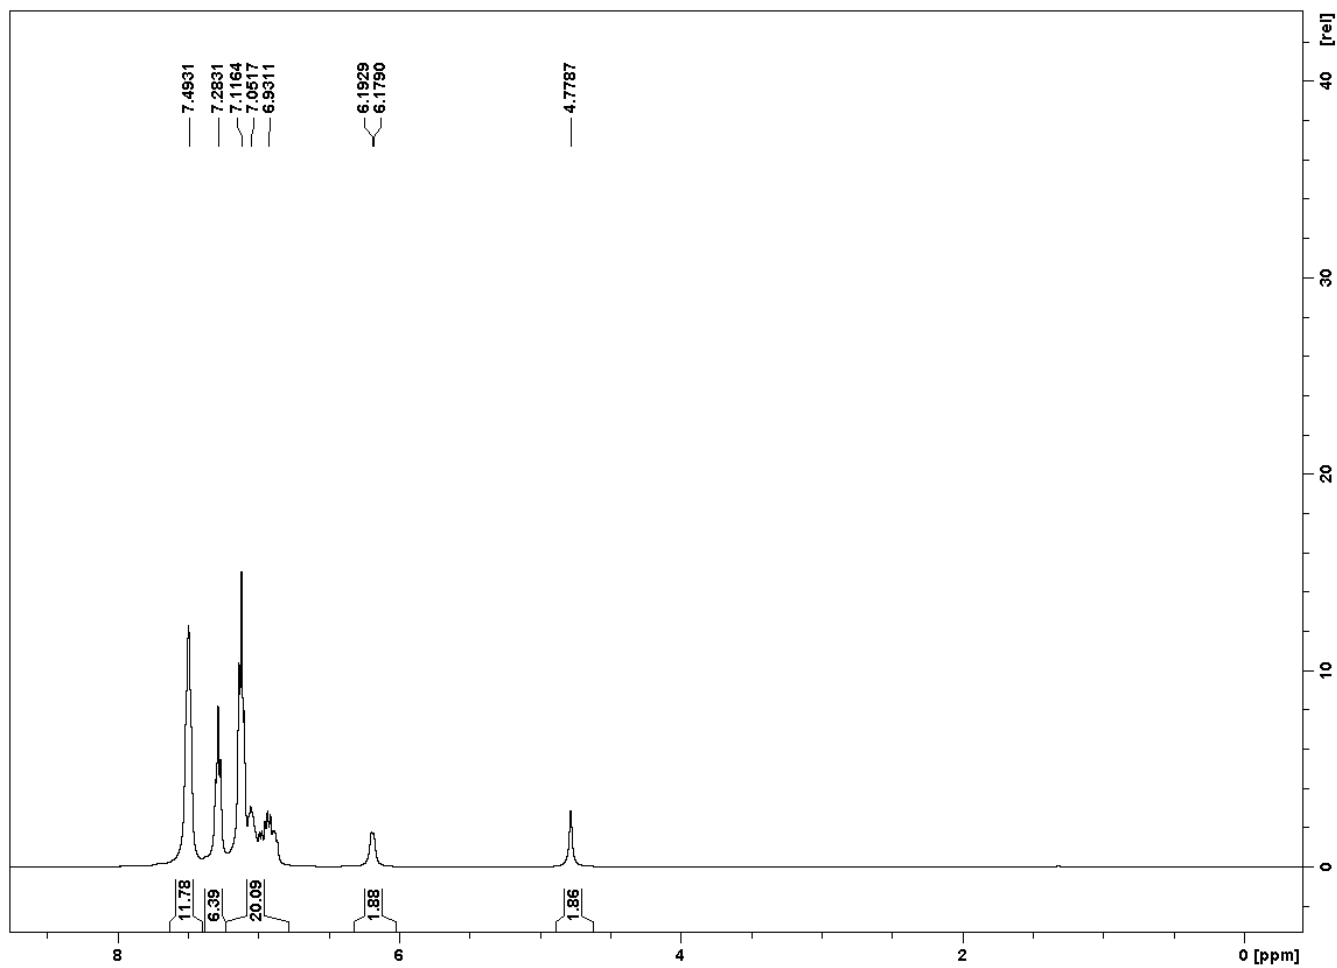

**Figure S1.**  $^1\text{H}$  NMR spectrum of  $\text{RuCl}_2(\text{PPh}_3)_2(\kappa^2\text{-NH}_2\text{-1,2-C}_6\text{H}_4\text{-NHPh})$  (1) in  $\text{CDCl}_3$  normalized to 42 protons.

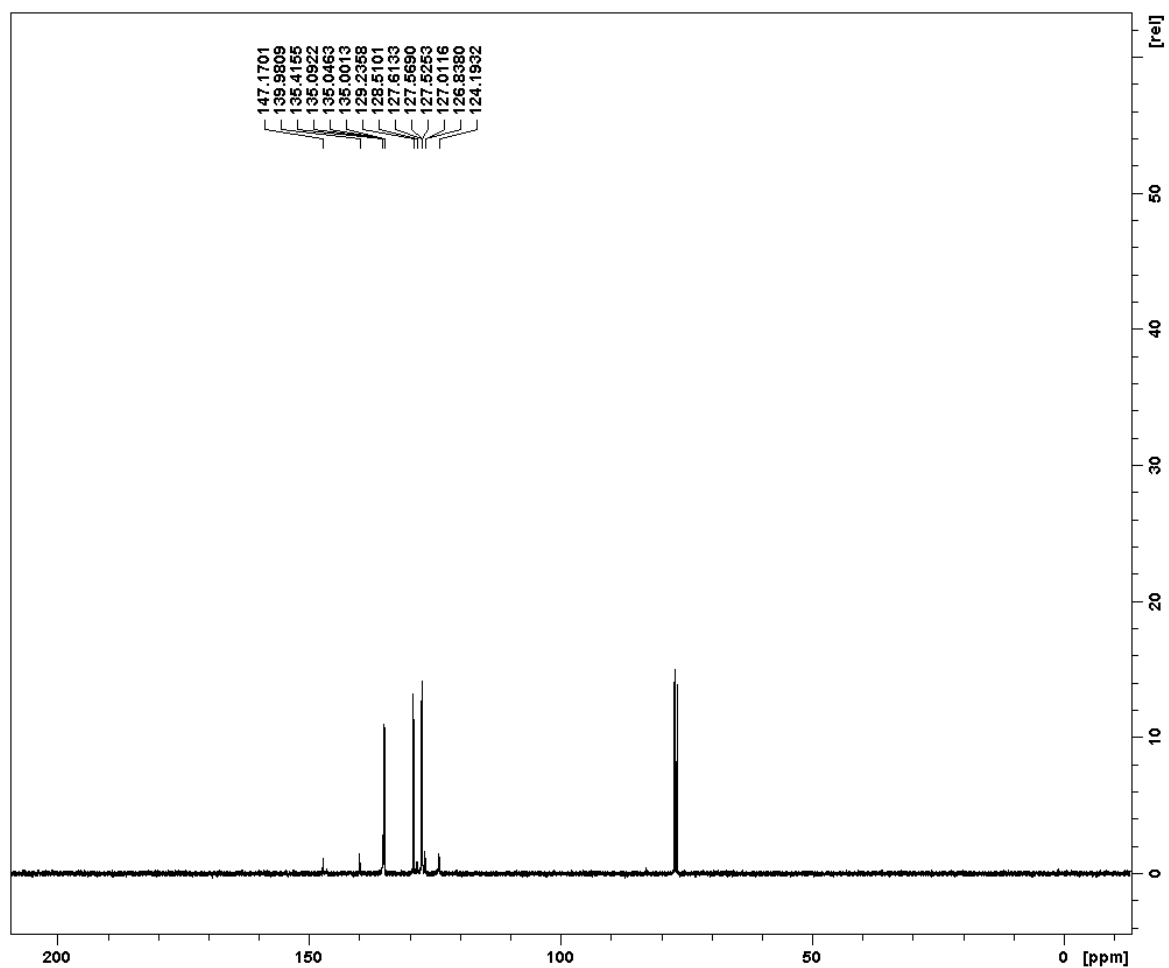

**Figure S2.**  $^{13}\text{C}\{^1\text{H}\}$  NMR spectrum of  $\text{RuCl}_2(\text{PPh}_3)_2(\kappa^2\text{-NH}_2\text{-1,2-C}_6\text{H}_4\text{-NHPh})$  (**1**) in  $\text{CDCl}_3$ .

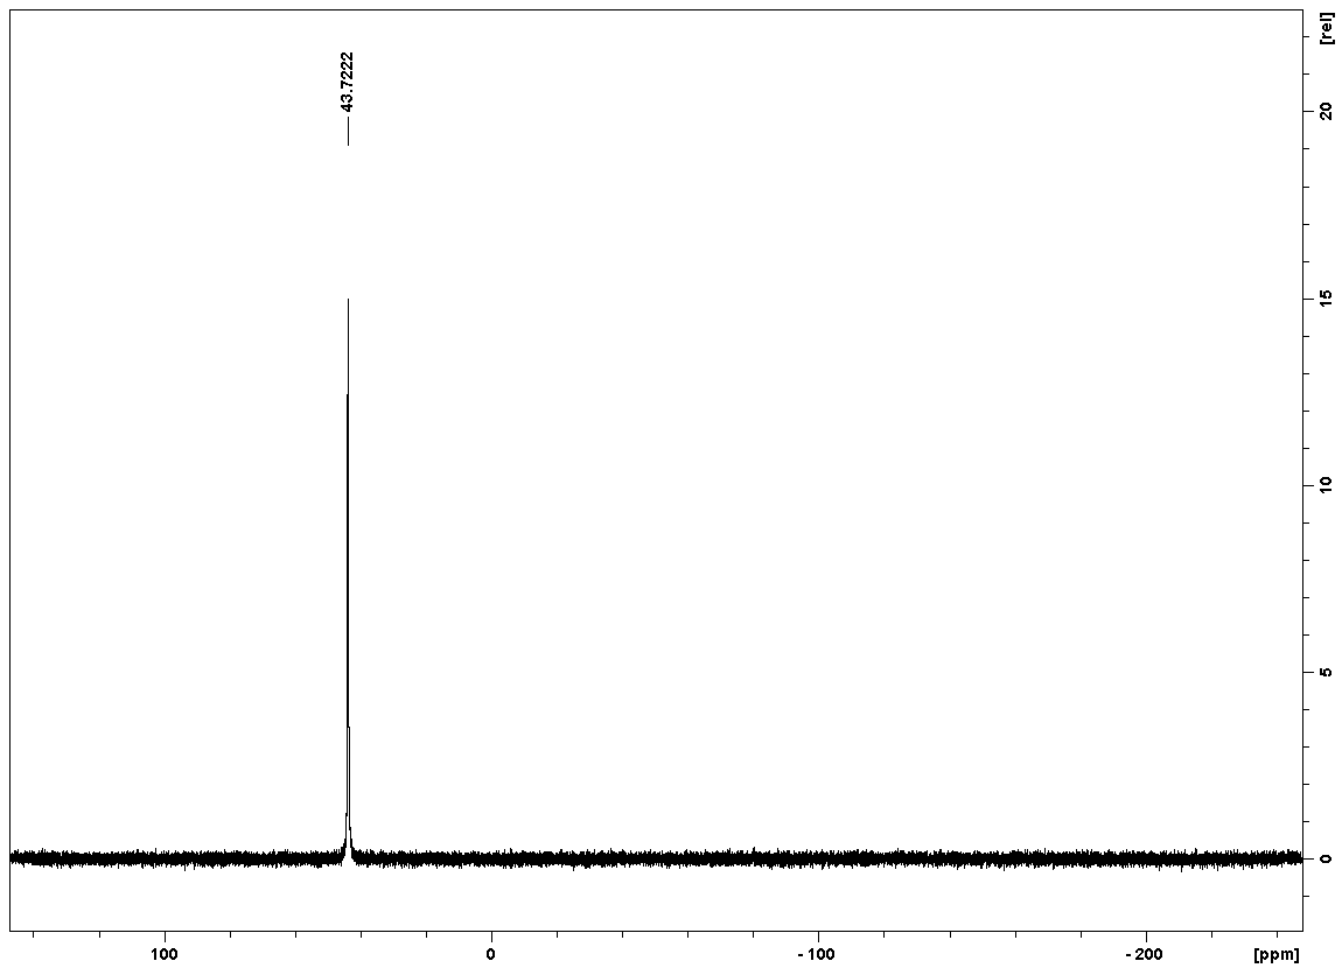

**Figure S3.** Room temperature  $^{31}\text{P}\{^1\text{H}\}$  NMR spectrum of  $\text{RuCl}_2(\text{PPh}_3)_2(\kappa^2\text{-NH}_2\text{-1,2-C}_6\text{H}_4\text{-NHPh})$  (**1**) in  $\text{CDCl}_3$ .

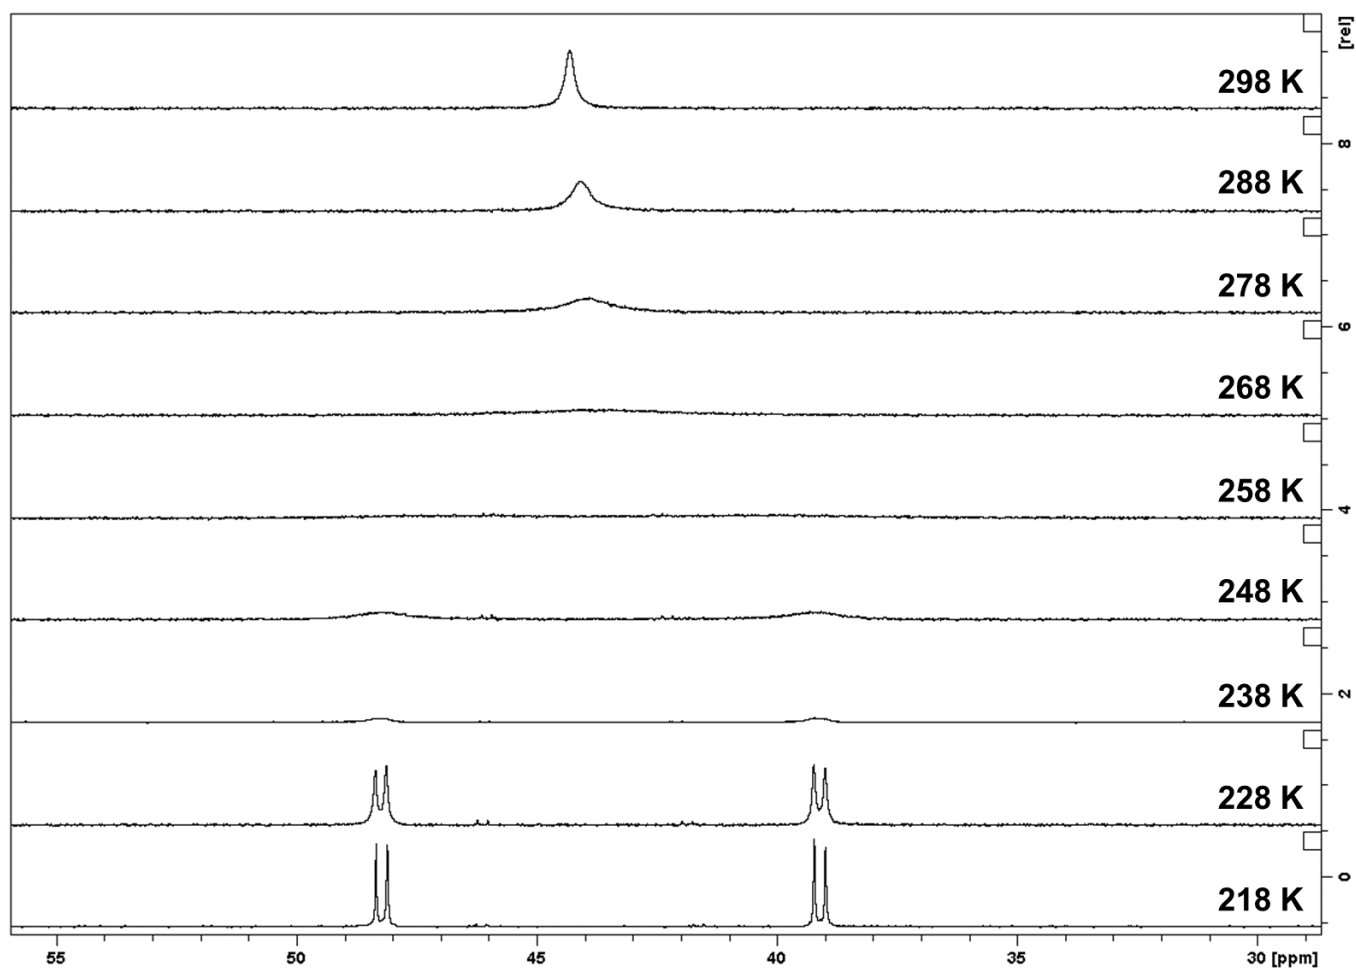

**Figure S4.** Variable temperature  $^{31}\text{P}\{^1\text{H}\}$  NMR spectrum of  $\text{RuCl}_2(\text{PPh}_3)_2(\kappa^2\text{-NH}_2\text{-1,2-C}_6\text{H}_4\text{-NHPh})$  (**1**) in  $\text{CDCl}_3$ .



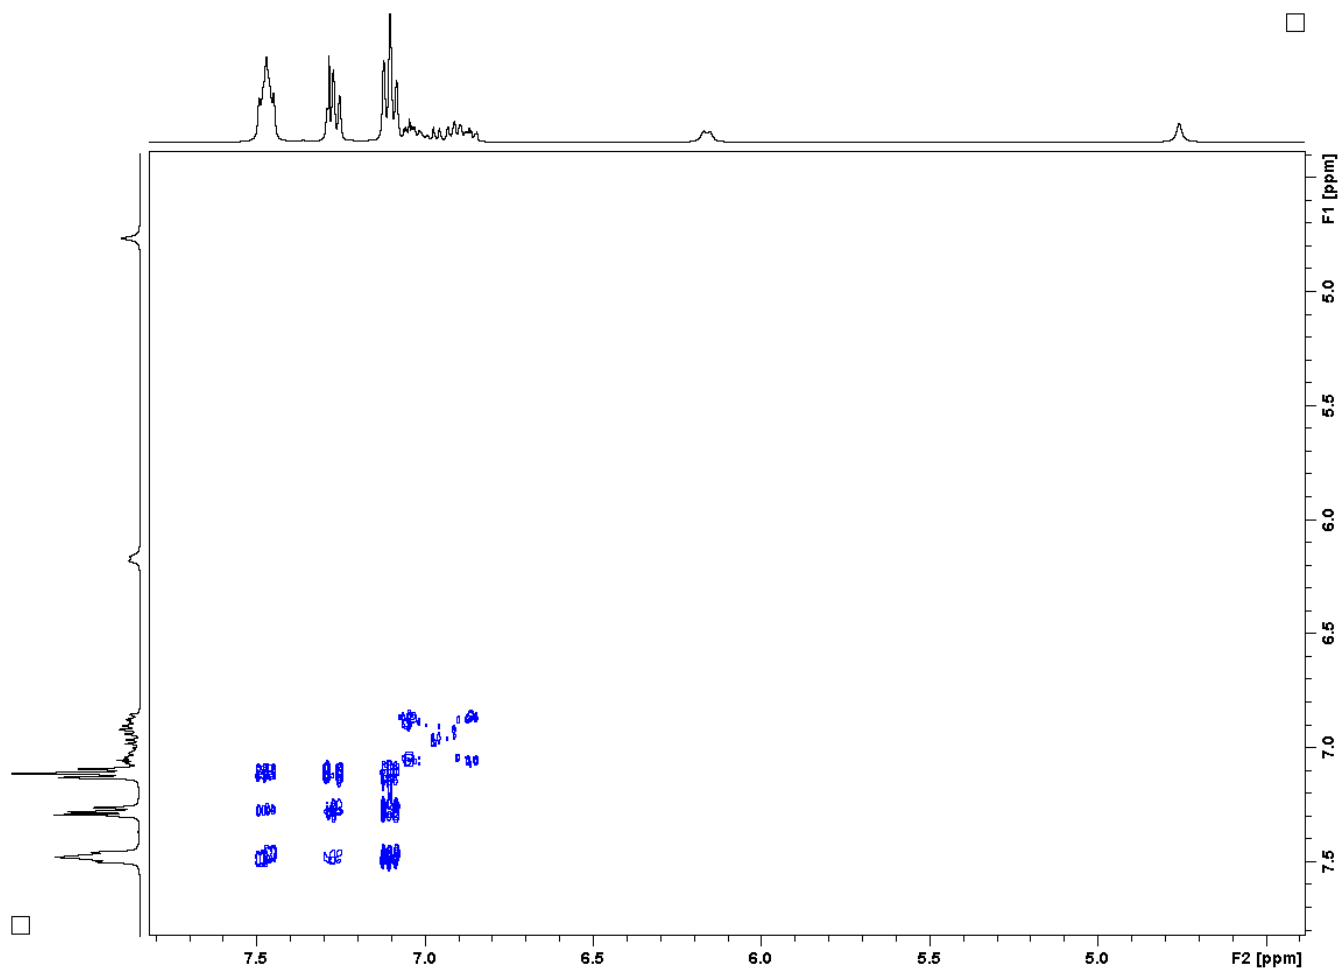

**Figure S5.** <sup>1</sup>H-<sup>1</sup>H COSY NMR spectrum of RuCl<sub>2</sub>(PPh<sub>3</sub>)<sub>2</sub>(κ<sup>2</sup>-NH<sub>2</sub>-1,2-C<sub>6</sub>H<sub>4</sub>-NHPh) (**1**) in CDCl<sub>3</sub>.

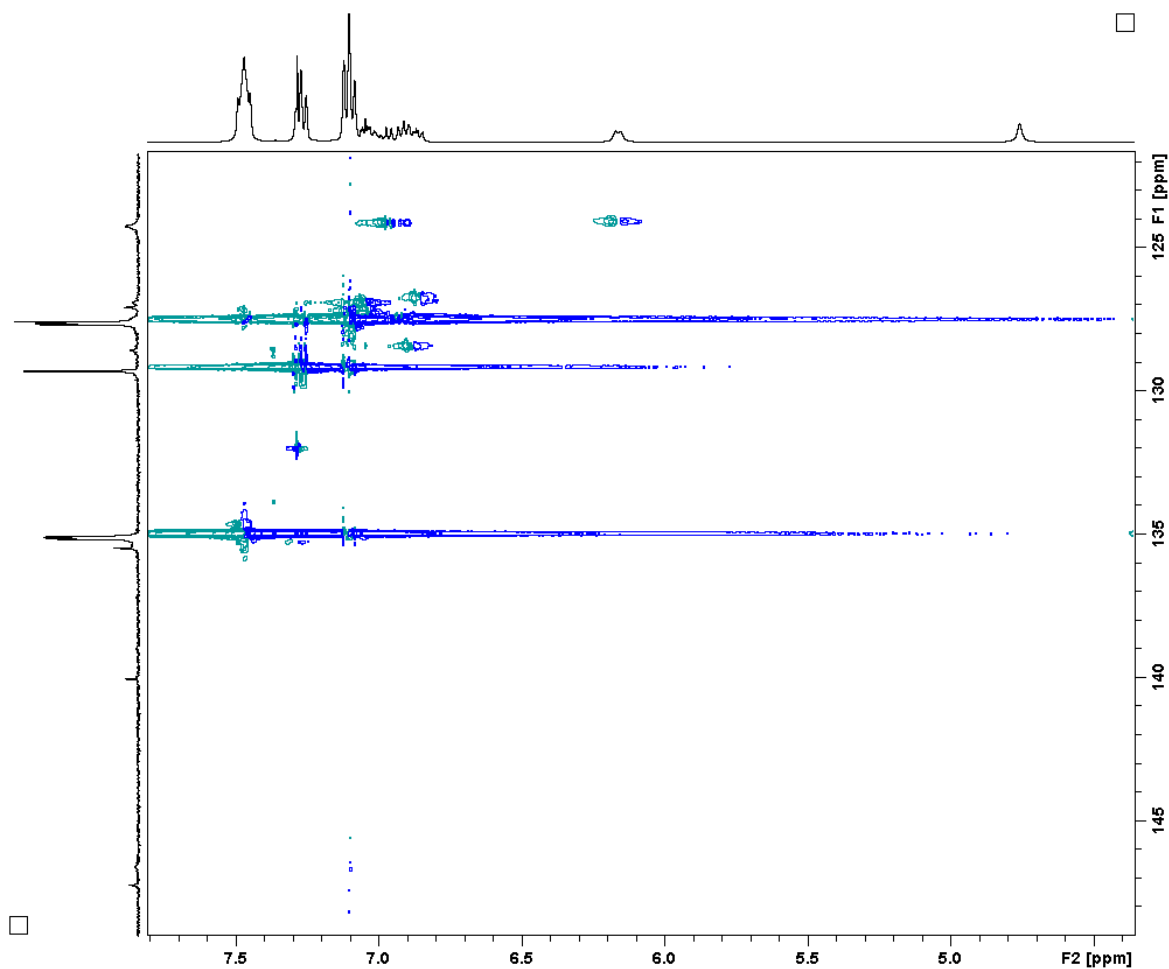

**Figure S6.**  $^1\text{H}$ - $^{13}\text{C}$  HSQC NMR spectrum of  $\text{RuCl}_2(\text{PPh}_3)_2(\kappa^2\text{-NH}_2\text{-1,2-C}_6\text{H}_4\text{-NHPh})$  (**1**) in  $\text{CDCl}_3$ .

#### 4. FTIR spectrum

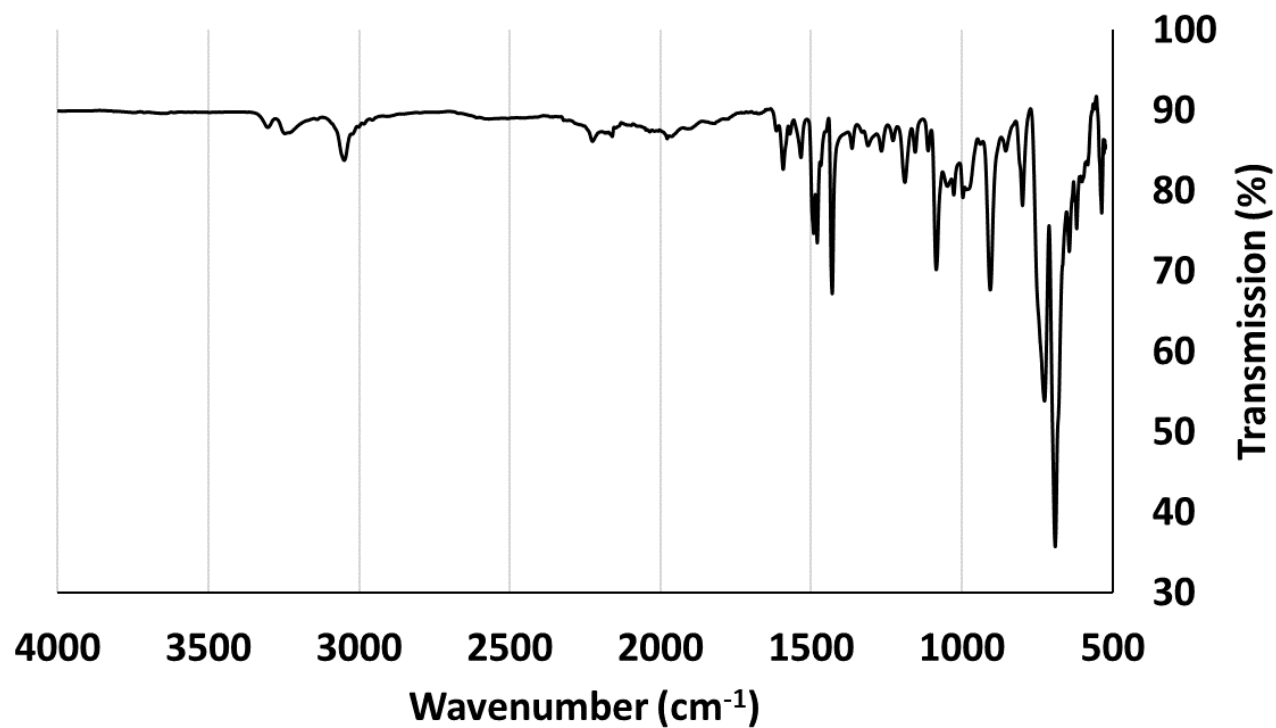

**Figure S7.** FTIR spectrum of  $\text{RuCl}_2(\text{PPh}_3)_2(\kappa^2\text{-NH}_2\text{-1,2-C}_6\text{H}_4\text{-NHPh})$  (1).

## 5. UV-vis data

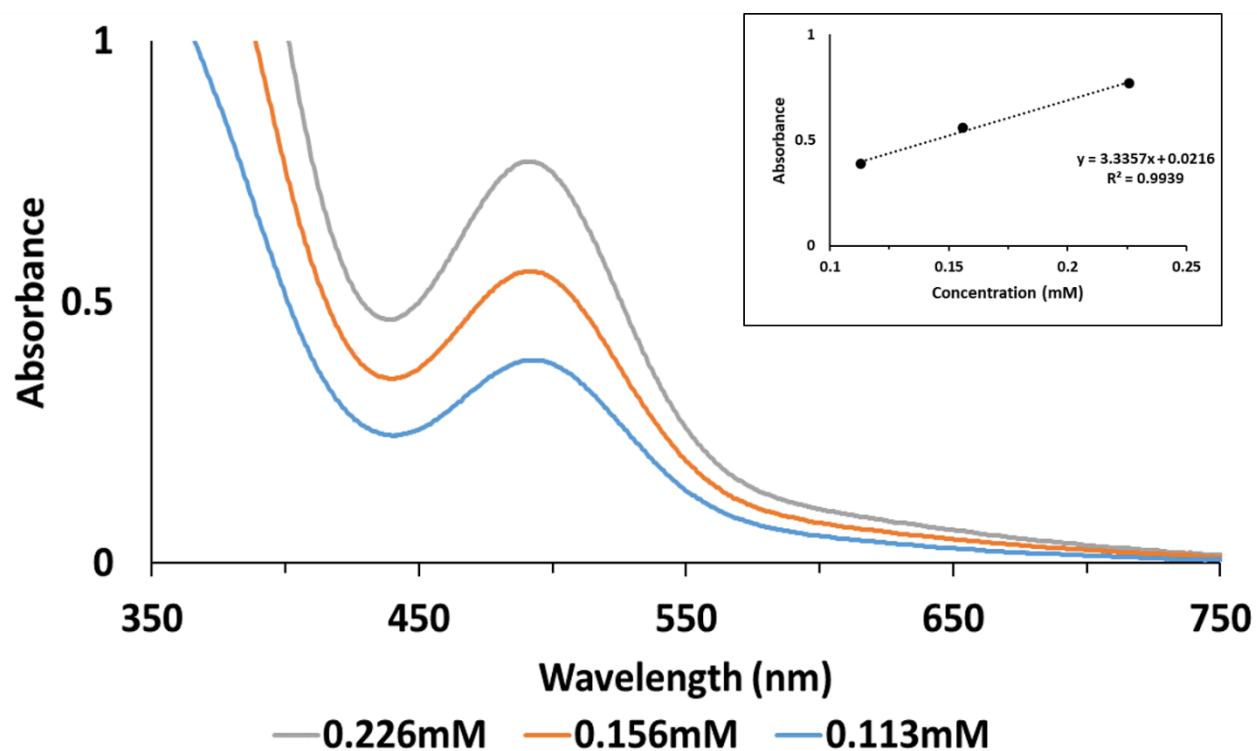

**Figure S8.** UV-vis spectra of  $\text{RuCl}_2(\text{PPh}_3)_2(\kappa^2\text{-NH}_2\text{-1,2-C}_6\text{H}_4\text{-NHPh})$  (1) recorded under anaerobic conditions in dichloromethane. Beer-Lambert plot included for  $\lambda_{\text{max}} = 492$  nm.

## 6. Single crystal X-ray diffraction data

**Table S1.** Crystallographic data for the polymorphs of compound **1**.

|                                                                          | $\alpha$ - <b>1</b>                                                              | $\beta$ - <b>1</b>                                                               |
|--------------------------------------------------------------------------|----------------------------------------------------------------------------------|----------------------------------------------------------------------------------|
| chemical formula                                                         | C <sub>48</sub> H <sub>42</sub> Cl <sub>2</sub> N <sub>2</sub> P <sub>2</sub> Ru | C <sub>48</sub> H <sub>42</sub> Cl <sub>2</sub> N <sub>2</sub> P <sub>2</sub> Ru |
| formula weight                                                           | 880.74                                                                           | 880.74                                                                           |
| radiation source, $\lambda$ (Å)                                          | 0.71073                                                                          | 0.71073                                                                          |
| crystal system                                                           | monoclinic                                                                       | orthorhombic                                                                     |
| space group                                                              | <i>P2<sub>1</sub>/n</i>                                                          | <i>P2<sub>1</sub>2<sub>1</sub>2<sub>1</sub></i>                                  |
| <i>T</i> (K)                                                             | 100(2)                                                                           | 100(2)                                                                           |
| <i>a</i> (Å)                                                             | 10.872(1)                                                                        | 12.798(3)                                                                        |
| <i>b</i> (Å)                                                             | 17.173(1)                                                                        | 12.949(3)                                                                        |
| <i>c</i> (Å)                                                             | 22.070(2)                                                                        | 24.832(5)                                                                        |
| $\alpha$ (deg)                                                           | 90                                                                               | 90                                                                               |
| $\beta$ (deg)                                                            | 90.648(1)                                                                        | 90                                                                               |
| $\gamma$ (deg)                                                           | 90                                                                               | 90                                                                               |
| <i>V</i> (Å <sup>3</sup> )                                               | 4120.2(6)                                                                        | 4115.4(2)                                                                        |
| <i>Z</i>                                                                 | 4                                                                                | 4                                                                                |
| <i>d</i> <sub>calc</sub> (g cm <sup>-3</sup> )                           | 1.420                                                                            | 1.422                                                                            |
| $\mu$ (mm <sup>-1</sup> )                                                | 0.625                                                                            | 0.625                                                                            |
| <i>F</i> (000)                                                           | 1808                                                                             | 1808                                                                             |
| crystal size (mm)                                                        | 0.37 x 0.18 x 0.17                                                               | 0.10 x 0.05 x 0.02                                                               |
| reflections collected                                                    | 88235                                                                            | 58890                                                                            |
| data/parameters/restraints                                               | 10401 / 508 / 0                                                                  | 9119 / 508 / 0                                                                   |
| <i>R</i> (int)                                                           | 0.0295                                                                           | 0.0866                                                                           |
| <i>R</i> <sub>1</sub> [ <i>I</i> > 2 $\sigma$ ( <i>I</i> )] <sup>a</sup> | 0.0260                                                                           | 0.0358                                                                           |
| w <i>R</i> <sub>2</sub> (all data) <sup>a</sup>                          | 0.0640                                                                           | 0.0781                                                                           |
| Largest difference peak and hole (e <sup>-</sup> Å <sup>-3</sup> )       | 0.421 and -0.273                                                                 | 0.673 and -0.597                                                                 |

$$^a R_1 = \frac{\sum ||F_o| - |F_c||}{\sum |F_o|}; wR_2 = \left\{ \frac{\sum [w(F_o^2 - F_c^2)^2]}{\sum [w(F_o^2)^2]} \right\}^{1/2}$$

**Table S2.** Relevant bond distances and angles of the first coordination sphere for the polymorphs and DFT-calculated structures in this study.

|             | Experimental <sup>a</sup> |            | DFT-calculated structures <sup>b</sup> |            |           |           |           |           |           |           |
|-------------|---------------------------|------------|----------------------------------------|------------|-----------|-----------|-----------|-----------|-----------|-----------|
|             | $\alpha$ -1               | $\beta$ -1 | $\alpha$ -1                            | $\beta$ -1 | <b>1b</b> | <b>1c</b> | <b>1d</b> | <b>1e</b> | <b>1f</b> | <b>1g</b> |
|             | Distances (Å)             |            |                                        |            |           |           |           |           |           |           |
| Ru – N1     | 2.160(1)                  | 2.166(4)   | 2.145                                  | 2.147      | 2.117     | 2.144     | 2.117     | 2.140     | 2.125     | 2.214     |
| Ru – N2     | 2.284(1)                  | 2.306(4)   | 2.313                                  | 2.304      | 2.219     | 2.350     | 2.266     | 2.360     | 2.272     | –         |
| Ru – P1     | 2.3006(4)                 | 2.295(1)   | 2.305                                  | 2.305      | 2.393     | 2.363     | 2.368     | 2.320     | 2.327     | 2.296     |
| Ru – P2     | 2.3265(4)                 | 2.324(1)   | 2.336                                  | 2.333      | 2.364     | 2.321     | 2.325     | 2.276     | 2.286     | 2.209     |
| Ru – Cl1    | 2.4127(4)                 | 2.389(1)   | 2.410                                  | 2.411      | 2.420     | 2.481     | 2.441     | 2.508     | 2.439     | 2.381     |
| Ru – Cl2    | 2.4246(4)                 | 2.424(1)   | 2.424                                  | 2.423      | 2.407     | 2.378     | 2.397     | 2.380     | 2.398     | 2.385     |
|             | Angles (°)                |            |                                        |            |           |           |           |           |           |           |
| N1-Ru1-N2   | 77.62(5)                  | 76.26(1)   | 77.04                                  | 76.87      | 80.95     | 74.37     | 78.92     | 75.14     | 78.81     | –         |
| N1-Ru1-P1   | 90.96(4)                  | 91.33(1)   | 91.11                                  | 91.13      | 90.04     | 166.60    | 165.80    | 98.84     | 96.44     | 159.35    |
| N1-Ru1-P2   | 171.26(4)                 | 169.45(1)  | 170.94                                 | 170.86     | 92.21     | 90.72     | 90.65     | 95.40     | 99.68     | 96.40     |
| N1-Ru1-Cl1  | 81.50(4)                  | 83.79(1)   | 81.16                                  | 80.99      | 172.59    | 78.91     | 78.58     | 80.48     | 79.47     | 81.60     |
| N1-Ru1-Cl2  | 81.92(4)                  | 81.82(1)   | 81.80                                  | 82.13      | 93.44     | 83.42     | 83.29     | 162.26    | 164.43    | 87.84     |
| N2-Ru1-P1   | 168.57(3)                 | 167.56(9)  | 168.14                                 | 167.99     | 102.30    | 103.97    | 102.73    | 158.78    | 167.57    | –         |
| N2-Ru1-P2   | 94.37(3)                  | 93.30(9)   | 94.33                                  | 94.39      | 91.34     | 103.28    | 93.24     | 99.09     | 90.29     | –         |
| N2-Ru1-Cl1  | 90.70(4)                  | 91.93(1)   | 90.90                                  | 90.76      | 91.77     | 75.89     | 87.06     | 74.07     | 83.13     | –         |
| N2-Ru1-Cl2  | 84.26(3)                  | 81.62(1)   | 81.44                                  | 81.57      | 171.40    | 155.39    | 162.21    | 87.50     | 87.28     | –         |
| P1-Ru1-P2   | 97.05(1)                  | 99.13(4)   | 97.53                                  | 97.62      | 166.35    | 102.53    | 103.27    | 101.75    | 101.88    | 103.96    |
| P1-Ru1-Cl1  | 87.45(1)                  | 85.85(4)   | 86.77                                  | 86.65      | 92.85     | 87.78     | 87.37     | 84.92     | 84.71     | 92.37     |
| P2-Ru1-Cl1  | 102.30(1)                 | 98.27(4)   | 101.97                                 | 102.05     | 86.58     | 169.47    | 168.97    | 172.68    | 173.40    | 97.17     |
| P1-Ru1-Cl2  | 94.35(1)                  | 97.58(4)   | 97.50                                  | 97.62      | 84.11     | 95.16     | 94.43     | 96.09     | 95.74     | 93.46     |
| P2-Ru1-Cl2  | 93.92(1)                  | 95.32(4)   | 94.31                                  | 94.06      | 82.32     | 87.22     | 87.26     | 90.87     | 87.24     | 95.67     |
| Cl1-Ru1-Cl2 | 163.35(1)                 | 165.28(4)  | 162.50                                 | 162.66     | 93.64     | 89.73     | 89.11     | 91.39     | 92.04     | 164.19    |

<sup>a</sup> See crystallographic information file (CIF) for numbering scheme.

<sup>b</sup> See Figure S8 for numbering scheme.



## 7. PXRD diffractograms

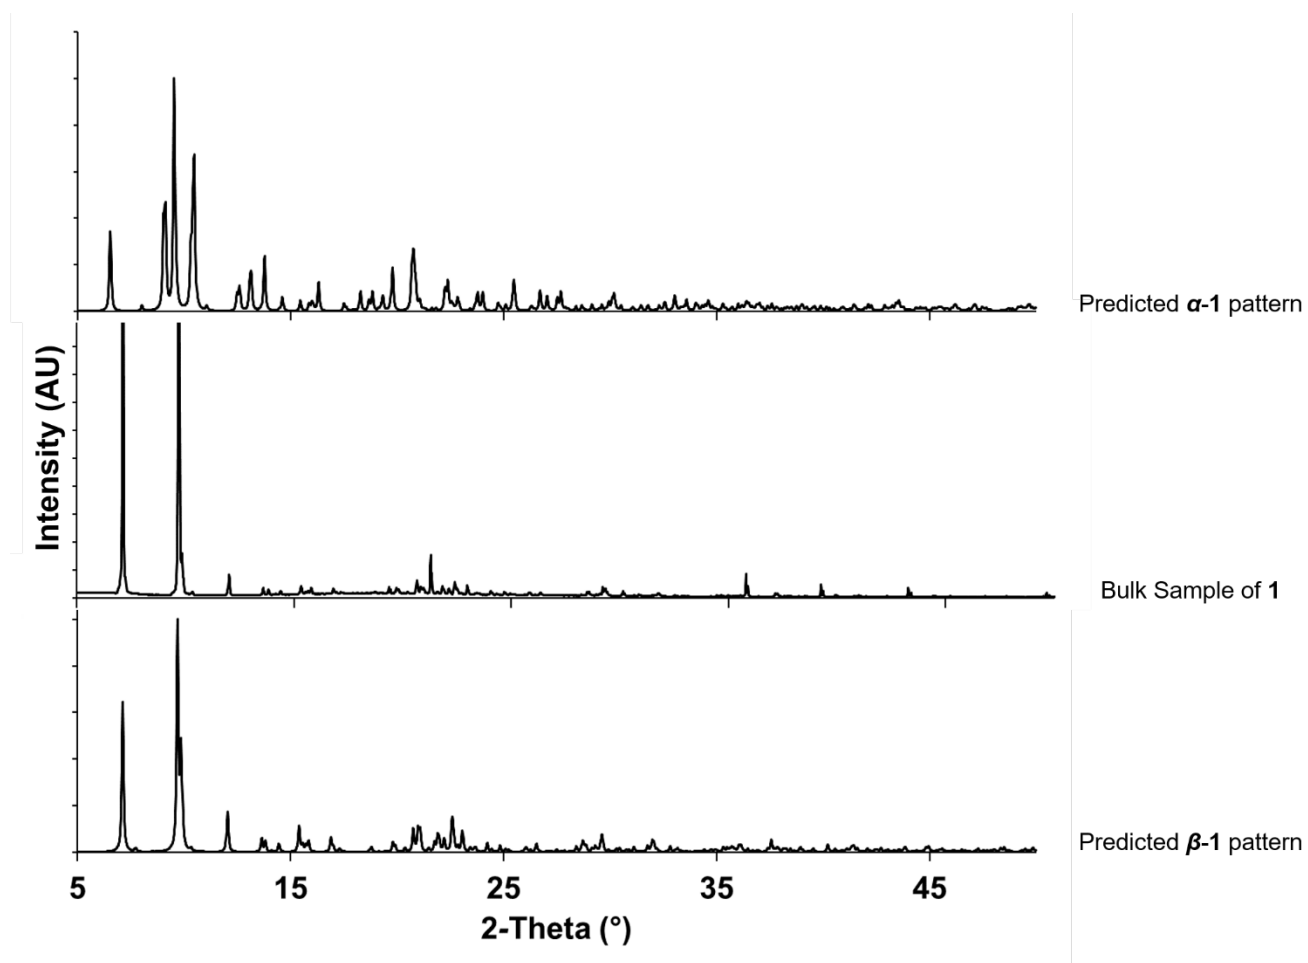

**Figure S9.** Powder X-ray diffraction pattern for the bulk sample of **1**, and the predicted powder patterns of the  $\alpha$  and  $\beta$  polymorphs. Predicted powder patterns obtained from the single crystal diffraction data (CIF).



## 8. DFT numbering scheme, data, and coordinates

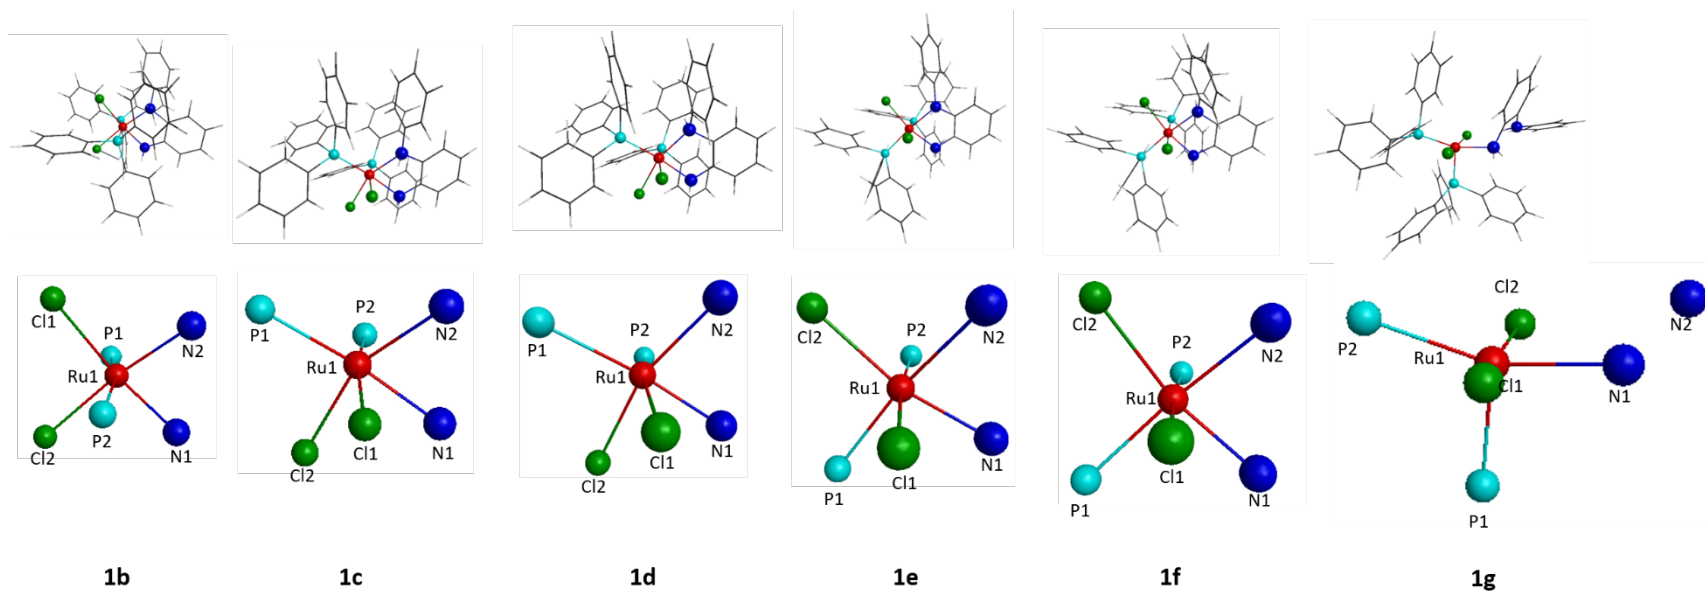

**Figure S10.** Numbering scheme for the  $\text{RuCl}_2(\text{PPh}_3)_2(\kappa^2\text{-NH}_2\text{-1,2-C}_6\text{H}_4\text{-NHPh})$  predicted structures (**1b** – **1f**) and the monodentate structure  $\text{RuCl}_2(\text{PPh}_3)_2(\text{NH}_2\text{-1,2-C}_6\text{H}_4\text{-NHPh})$  (**1g**).

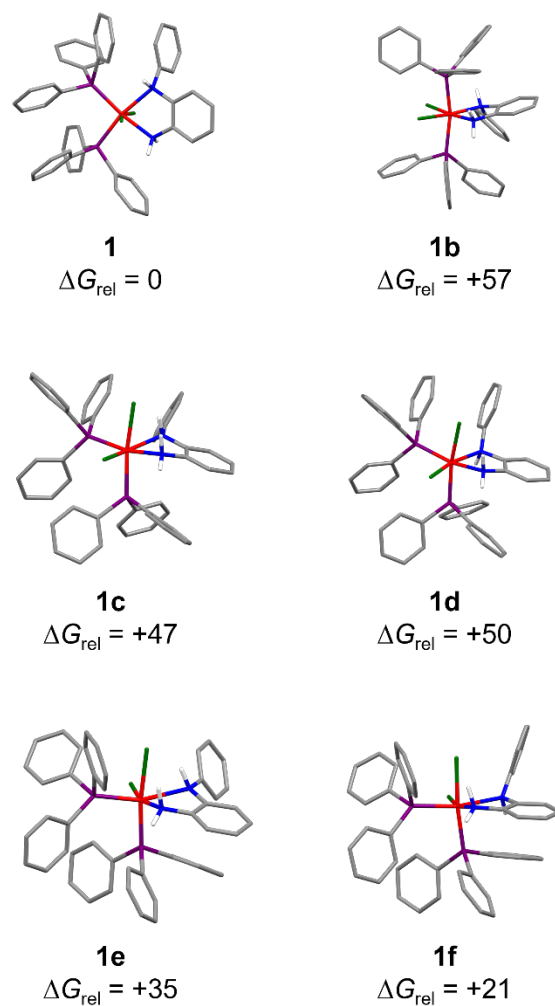

**Figure S11.** DFT-calculated structures and relative Gibbs free energies ( $\text{kJ mol}^{-1}$ ) of compound **1** and its seven geometric isomers **1b** – **1f**. Color code: carbon (grey), hydrogen (white), nitrogen (blue), phosphorus (purple), chlorine (green), ruthenium (red). Phenyl hydrogen atoms are omitted for clarity.

Cartesian coordinates for  $\alpha$ -1:

|    |             |             |             |
|----|-------------|-------------|-------------|
| Ru | -0.13928200 | 0.70863301  | 0.08619200  |
| Cl | -0.09067400 | 1.10243106  | 2.47721410  |
| Cl | -0.25338700 | 1.04712796  | -2.29714394 |
| P  | -0.78567398 | -1.52639306 | 0.28969499  |
| P  | 2.11822295  | 0.34475499  | -0.20476300 |
| C  | -1.19843996 | -2.47849703 | -1.23298395 |
| C  | -0.94381499 | -3.84220505 | -1.38180900 |
| H  | -0.43277001 | -4.38843393 | -0.60030800 |
| C  | -1.34829497 | -4.51674986 | -2.52465296 |
| H  | -1.13807595 | -5.57538700 | -2.62307811 |
| C  | -2.02479696 | -3.84265304 | -3.53091097 |
| H  | -2.34032202 | -4.37039089 | -4.42338705 |
| C  | -2.29582500 | -2.49045396 | -3.38608909 |
| H  | -2.82420301 | -1.95184505 | -4.16352701 |
| C  | -1.88496995 | -1.81236899 | -2.24804902 |
| H  | -2.08375406 | -0.75329202 | -2.15807295 |
| C  | -2.36377501 | -1.78609502 | 1.23193204  |
| C  | -2.56639504 | -1.12209702 | 2.44422889  |
| H  | -1.80429006 | -0.44611299 | 2.81806493  |
| C  | -3.72684598 | -1.31924701 | 3.18068409  |
| H  | -3.85713601 | -0.79194200 | 4.11865711  |
| C  | -4.70840311 | -2.18554306 | 2.72262311  |
| H  | -5.61550617 | -2.33877802 | 3.29534411  |
| C  | -4.51432323 | -2.85692000 | 1.52501905  |
| H  | -5.27076006 | -3.53930998 | 1.15508294  |
| C  | -3.35477304 | -2.66115594 | 0.78781998  |
| H  | -3.23398089 | -3.19290400 | -0.14586800 |
| C  | 0.30474800  | -2.71264005 | 1.18642604  |
| C  | 1.46015799  | -3.18537307 | 0.56291401  |
| H  | 1.71250796  | -2.85540700 | -0.43705499 |
| C  | 2.29428005  | -4.09185886 | 1.19561303  |
| H  | 3.18247104  | -4.44529581 | 0.68606001  |

|   |             |             |             |
|---|-------------|-------------|-------------|
| C | 2.00036192  | -4.53270388 | 2.47736692  |
| H | 2.65449905  | -5.23827696 | 2.97564411  |
| C | 0.86608499  | -4.05886984 | 3.11527896  |
| H | 0.62485999  | -4.39208794 | 4.11792278  |
| C | 0.02296800  | -3.16148305 | 2.47414303  |
| H | -0.86479598 | -2.82156205 | 2.98882794  |
| C | 2.71505499  | -0.36557701 | -1.79715705 |
| C | 1.93359101  | -1.28927600 | -2.48349094 |
| H | 0.93858898  | -1.51767397 | -2.13016009 |
| C | 2.39190006  | -1.88780200 | -3.64758992 |
| H | 1.75867403  | -2.59945107 | -4.16376591 |
| C | 3.63739896  | -1.55736804 | -4.15805197 |
| H | 3.99301291  | -2.01673007 | -5.07287216 |
| C | 4.41903687  | -0.62077099 | -3.49815106 |
| H | 5.38925219  | -0.34346500 | -3.89346290 |
| C | 3.96171308  | -0.03088600 | -2.32939601 |
| H | 4.58421707  | 0.70431602  | -1.83514905 |
| C | 2.96041608  | 1.98645604  | -0.23514500 |
| C | 2.91135597  | 2.76943803  | -1.39148998 |
| H | 2.44477296  | 2.37263608  | -2.28633404 |
| C | 3.44419503  | 4.04935598  | -1.40067101 |
| H | 3.40483499  | 4.63880587  | -2.30930591 |
| C | 4.02416420  | 4.57428312  | -0.25318599 |
| H | 4.44204998  | 5.57398415  | -0.26178399 |
| C | 4.06679010  | 3.80975699  | 0.90252602  |
| H | 4.51678324  | 4.20931721  | 1.80370700  |
| C | 3.53978705  | 2.52403092  | 0.91248298  |
| H | 3.58260894  | 1.93670404  | 1.82147598  |
| C | 3.18229389  | -0.53545803 | 1.02436399  |
| C | 4.41544485  | -1.08774304 | 0.67508101  |
| H | 4.74851799  | -1.08074605 | -0.35309801 |
| C | 5.22928476  | -1.67022395 | 1.63398099  |
| H | 6.18216276  | -2.09416389 | 1.33857501  |

|   |             |             |             |
|---|-------------|-------------|-------------|
| C | 4.82702398  | -1.71364295 | 2.96073198  |
| H | 5.46435308  | -2.16881800 | 3.70996094  |
| C | 3.59949994  | -1.17878497 | 3.31594300  |
| H | 3.26511002  | -1.21553504 | 4.34604979  |
| C | 2.78091407  | -0.59821802 | 2.35716796  |
| H | 1.82139599  | -0.18853900 | 2.64565110  |
| N | -2.27494001 | 1.53142405  | 0.34156200  |
| C | -2.18441200 | 2.94816995  | 0.64637101  |
| C | -0.96845102 | 3.58929610  | 0.50898600  |
| N | 0.15484200  | 2.83331800  | 0.04030000  |
| C | -3.29327989 | 3.65715003  | 1.09048104  |
| C | -3.17874503 | 4.99731302  | 1.41427195  |
| C | -1.95348895 | 5.63838816  | 1.28805900  |
| C | -0.85225898 | 4.93492794  | 0.83378798  |
| C | -3.35312891 | 1.25673103  | -0.57732701 |
| C | -3.36372304 | 1.85396695  | -1.83307898 |
| C | -4.40795708 | 1.60222197  | -2.70665789 |
| C | -5.44953680 | 0.76006299  | -2.34032798 |
| C | -5.44357395 | 0.17951301  | -1.08273602 |
| C | -4.40427303 | 0.43272999  | -0.19835800 |
| H | -2.45975900 | 1.04740596  | 1.21784699  |
| H | 0.98712701  | 3.09853411  | 0.55615997  |
| H | 0.32424399  | 3.01193905  | -0.94955897 |
| H | -4.24606991 | 3.14912200  | 1.18033302  |
| H | -4.04494619 | 5.54136992  | 1.76994801  |
| H | -1.85666800 | 6.68628120  | 1.54380703  |
| H | 0.11059000  | 5.42299795  | 0.73122698  |
| H | -2.54557896 | 2.49482989  | -2.12798309 |
| H | -4.40283918 | 2.06680107  | -3.68538904 |
| H | -6.26269007 | 0.56498700  | -3.02891493 |
| H | -6.25419283 | -0.47031900 | -0.77564400 |
| H | -4.41676998 | -0.01210400 | 0.78881902  |

Cartesian coordinates for  $\beta$ -1:

|    |             |             |             |
|----|-------------|-------------|-------------|
| Ru | 0.00658885  | 0.03181645  | -0.02261822 |
| Cl | 1.29621637  | 2.06493235  | -0.14601861 |
| Cl | -0.76976299 | -2.23838139 | -0.35878292 |
| P  | 0.93032837  | -0.26751047 | 2.06806302  |
| P  | -2.07795906 | 0.81854761  | 0.66973650  |
| N  | 1.77338219  | -0.74702460 | -0.96142340 |
| H  | 2.14626169  | -1.53798163 | -0.44751078 |
| H  | 2.42816663  | 0.02999491  | -0.86884713 |
| N  | -0.48864946 | 0.17330202  | -2.26875663 |
| H  | -1.34631431 | -0.37199751 | -2.21349549 |
| C  | 1.59537649  | -1.09876680 | -2.33839393 |
| C  | 0.47794279  | -0.62671465 | -2.99948359 |
| C  | 0.28313562  | -0.93963522 | -4.33858681 |
| C  | 1.19352925  | -1.73985159 | -5.00571585 |
| C  | 2.30939317  | -2.22564793 | -4.33717155 |
| C  | 2.51004028  | -1.90235424 | -3.00699902 |
| C  | -0.77278554 | 1.41332257  | -2.95015931 |
| C  | -2.06095028 | 1.69267058  | -3.38673019 |
| C  | -2.32824254 | 2.88121748  | -4.05154228 |
| C  | -1.31110024 | 3.78797722  | -4.30030012 |
| C  | -0.01995280 | 3.49451113  | -3.88203287 |
| C  | 0.25363114  | 2.31442261  | -3.21159005 |
| C  | 2.58448195  | -1.05757189 | 1.85525167  |
| C  | 3.67633677  | -0.28411633 | 1.45203435  |
| C  | 4.90243387  | -0.87587941 | 1.19027686  |
| C  | 5.05704021  | -2.25049734 | 1.31420362  |
| C  | 3.97621465  | -3.02795553 | 1.70064807  |
| C  | 2.74819636  | -2.43653131 | 1.97055686  |
| C  | 0.21079786  | -1.37810862 | 3.35843635  |
| C  | -0.62946957 | -2.42069244 | 2.97324395  |
| C  | -1.11502159 | -3.32111049 | 3.91117406  |
| C  | -0.77823025 | -3.19189906 | 5.24871063  |

|   |             |             |             |
|---|-------------|-------------|-------------|
| C | 0.04478570  | -2.14804697 | 5.64508009  |
| C | 0.53425610  | -1.24965835 | 4.70999908  |
| C | 1.39502096  | 1.21247494  | 3.06320596  |
| C | 2.48003674  | 1.19781315  | 3.94177222  |
| C | 2.77670550  | 2.30275893  | 4.72554445  |
| C | 1.99324095  | 3.44445801  | 4.64600754  |
| C | 0.92134356  | 3.47643065  | 3.76794171  |
| C | 0.63340598  | 2.37313890  | 2.97867799  |
| C | -2.87426758 | 0.09522954  | 2.16747236  |
| C | -3.93266988 | -0.80639380 | 2.09006238  |
| C | -4.50917387 | -1.32762527 | 3.24033308  |
| C | -4.04560757 | -0.94941801 | 4.48937988  |
| C | -2.99045110 | -0.05388796 | 4.58090878  |
| C | -2.40707040 | 0.45440882  | 3.43239093  |
| C | -2.29791689 | 2.62400913  | 0.96748072  |
| C | -3.14581752 | 3.14651513  | 1.94462574  |
| C | -3.32540059 | 4.51683998  | 2.06594276  |
| C | -2.67089653 | 5.38601780  | 1.20519388  |
| C | -1.83776855 | 4.87605333  | 0.22100480  |
| C | -1.65064573 | 3.50684166  | 0.10309846  |
| C | -3.44366336 | 0.56127292  | -0.56128824 |
| C | -4.36353540 | 1.56548178  | -0.86188459 |
| C | -5.39252853 | 1.34183443  | -1.76579225 |
| C | -5.52705240 | 0.10983428  | -2.38768268 |
| C | -4.62423611 | -0.90071160 | -2.09195304 |
| C | -3.59390044 | -0.67840856 | -1.18799543 |
| H | -0.58856595 | -0.55206567 | -4.85236406 |
| H | 1.02995813  | -1.98920417 | -6.04679585 |
| H | 3.02300954  | -2.85625434 | -4.85283709 |
| H | 3.37722826  | -2.27463174 | -2.47301674 |
| H | -2.85950422 | 0.98240155  | -3.21243763 |
| H | -3.33919883 | 3.08809900  | -4.38147497 |
| H | -1.51932359 | 4.71381474  | -4.82264328 |

|   |             |             |             |
|---|-------------|-------------|-------------|
| H | 0.78585631  | 4.19272375  | -4.07411623 |
| H | 1.25628161  | 2.09876037  | -2.87211108 |
| H | 3.55858231  | 0.78769410  | 1.33684433  |
| H | 5.74053431  | -0.25900140 | 0.88749862  |
| H | 6.01628399  | -2.71182799 | 1.11143339  |
| H | 4.08525085  | -4.10150003 | 1.80000281  |
| H | 1.91341937  | -3.05538106 | 2.27578402  |
| H | -0.90445632 | -2.52721286 | 1.93171644  |
| H | -1.76706362 | -4.12361193 | 3.58701491  |
| H | -1.15971792 | -3.89441371 | 5.98060513  |
| H | 0.30836734  | -2.02740431 | 6.68955517  |
| H | 1.16273189  | -0.43843415 | 5.04934549  |
| H | 3.10962915  | 0.31992334  | 4.01399088  |
| H | 3.62545729  | 2.26894784  | 5.39854431  |
| H | 2.22613502  | 4.30899382  | 5.25649357  |
| H | 0.31364223  | 4.36867046  | 3.67599916  |
| H | -0.17083189 | 2.43439794  | 2.26035571  |
| H | -4.32603168 | -1.10525310 | 1.12854958  |
| H | -5.33129597 | -2.02830338 | 3.15279126  |
| H | -4.50001335 | -1.35158789 | 5.38702679  |
| H | -2.60991740 | 0.24545178  | 5.54994583  |
| H | -1.58425629 | 1.15136123  | 3.53107071  |
| H | -3.67851663 | 2.48392677  | 2.61364698  |
| H | -3.98571277 | 4.90346479  | 2.83347178  |
| H | -2.81174541 | 6.45632792  | 1.30087578  |
| H | -1.32170331 | 5.54322529  | -0.45889577 |
| H | -0.98192328 | 3.12403822  | -0.65553874 |
| H | -4.27951431 | 2.53831863  | -0.39778426 |
| H | -6.09131384 | 2.14095426  | -1.98437047 |
| H | -6.33041716 | -0.06187624 | -3.09440255 |
| H | -4.71820784 | -1.87271035 | -2.56229162 |
| H | -2.89838219 | -1.47972238 | -0.96059591 |



Cartesian coordinates for **1b**:

|    |             |             |             |
|----|-------------|-------------|-------------|
| Ru | 0.11230500  | 0.25995299  | -0.03983400 |
| N  | 0.09867700  | -1.84810495 | -0.73103398 |
| C  | 0.32853499  | -2.68743992 | 0.42791399  |
| C  | 0.28913701  | -2.13335490 | 1.69972396  |
| N  | 0.11737700  | -0.70788199 | 1.84281504  |
| Cl | 0.16187000  | 1.08413303  | -2.31456304 |
| Cl | 0.40223601  | 2.44789195  | 0.92158902  |
| P  | -2.22074699 | 0.73085201  | 0.20648600  |
| P  | 2.47434306  | 0.32731900  | -0.11396500 |
| C  | -3.51148891 | -0.55998701 | -0.09490000 |
| C  | -2.79523206 | 2.16142392  | -0.77296799 |
| C  | -2.80322194 | 1.18111503  | 1.91352904  |
| C  | 3.20250511  | 0.30983299  | 1.57026398  |
| C  | 3.37465811  | 1.73545897  | -0.88114297 |
| C  | 3.30682302  | -1.05265403 | -1.01142395 |
| C  | -3.60475898 | -1.59690797 | 0.83639002  |
| C  | -2.82804799 | 2.07840490  | -2.16602302 |
| C  | -1.92891002 | 1.51278102  | 2.94597006  |
| C  | 3.26197195  | -0.85641998 | 2.33727598  |
| C  | 2.73311710  | 2.87304902  | -1.35741794 |
| C  | 2.90198207  | -1.22406399 | -2.33989692 |
| C  | -4.59736586 | -2.55702209 | 0.74669403  |
| C  | -3.23441696 | 3.16435504  | -2.92505002 |
| C  | -2.40766692 | 1.82525206  | 4.21406603  |
| C  | 3.71336198  | -0.82621700 | 3.65041494  |
| C  | 3.47524405  | 3.90349889  | -1.92074394 |
| C  | 3.45845890  | -2.21950889 | -3.12894702 |
| C  | -5.51378107 | -2.51298499 | -0.29550400 |
| C  | -3.58770990 | 4.35548210  | -2.30900502 |
| C  | -3.76826310 | 1.83074903  | 4.46711206  |
| C  | 4.09986210  | 0.37425500  | 4.22584200  |
| C  | 4.85428476  | 3.81179690  | -2.01230502 |

|   |             |             |             |
|---|-------------|-------------|-------------|
| C | 4.43323612  | -3.05865908 | -2.60872602 |
| C | -5.41987419 | -1.50364602 | -1.23884904 |
| C | -3.52688193 | 4.45681715  | -0.92799401 |
| C | -4.65314388 | 1.52882802  | 3.43993592  |
| C | 4.02560806  | 1.54255402  | 3.48121905  |
| C | 5.50112915  | 2.67810893  | -1.53834796 |
| C | 4.85486317  | -2.88559699 | -1.29932201 |
| C | -4.43180895 | -0.53191900 | -1.13672197 |
| C | -3.13315010 | 3.36800003  | -0.16449900 |
| C | -4.17579079 | 1.20403600  | 2.18195891  |
| C | 3.58077908  | 1.51323700  | 2.16877890  |
| C | 4.76484013  | 1.64750504  | -0.97957599 |
| C | 4.29910803  | -1.89069104 | -0.50634199 |
| C | 0.61917299  | -4.04181290 | 0.28432301  |
| C | 0.82958102  | -4.83893108 | 1.39388704  |
| C | 0.74255502  | -4.29147482 | 2.66807699  |
| C | 0.47929299  | -2.94222212 | 2.81597400  |
| C | -0.85426003 | -2.38385892 | -1.68431997 |
| C | -1.86232996 | -3.26030493 | -1.30845702 |
| C | -2.73267698 | -3.76839304 | -2.26155591 |
| C | -2.60598302 | -3.41216302 | -3.59406209 |
| C | -1.59973598 | -2.53275299 | -3.96559000 |
| C | -0.72564101 | -2.02171898 | -3.02074409 |
| H | 0.98301899  | -1.78665900 | -1.23512900 |
| H | 0.89127499  | -0.33873701 | 2.39535999  |
| H | -0.72261399 | -0.50488299 | 2.37890196  |
| H | -2.91212201 | -1.63990998 | 1.67028105  |
| H | -2.50405312 | 1.17443395  | -2.66294003 |
| H | -0.86987603 | 1.59956300  | 2.73713589  |
| H | 2.95950699  | -1.80547798 | 1.91196096  |
| H | 1.65886402  | 2.94879198  | -1.28985298 |
| H | 2.16249490  | -0.54297900 | -2.75521111 |
| H | -4.65996695 | -3.33781409 | 1.49599898  |

|   |             |             |             |
|---|-------------|-------------|-------------|
| H | -3.25418401 | 3.08215809  | -4.00525999 |
| H | -1.70551896 | 2.08359790  | 4.99825001  |
| H | 3.76450992  | -1.74707603 | 4.21997213  |
| H | 2.96195102  | 4.78284979  | -2.29115510 |
| H | 3.13299298  | -2.33228898 | -4.15634584 |
| H | -6.29704094 | -3.25835490 | -0.36686400 |
| H | -3.89670205 | 5.20630693  | -2.90497899 |
| H | -4.14144993 | 2.07963800  | 5.45362902  |
| H | 4.45424891  | 0.39991501  | 5.24942780  |
| H | 5.42687511  | 4.61910582  | -2.45426893 |
| H | 4.86971188  | -3.83627510 | -3.22411704 |
| H | -6.12923479 | -1.45597398 | -2.05667710 |
| H | -3.78177500 | 5.38872099  | -0.43731099 |
| H | -5.72189999 | 1.54567099  | 3.61860609  |
| H | 4.31384897  | 2.48843694  | 3.92408490  |
| H | 6.57934523  | 2.59374189  | -1.60705304 |
| H | 5.62935209  | -3.52353311 | -0.88947397 |
| H | -4.40447283 | 0.26675799  | -1.86515403 |
| H | -3.07937288 | 3.46764588  | 0.91121298  |
| H | -4.88280678 | 0.96678501  | 1.39700699  |
| H | 3.51597095  | 2.43354011  | 1.60393405  |
| H | 5.28114080  | 0.76495898  | -0.62011200 |
| H | 4.66266108  | -1.76070797 | 0.50414401  |
| H | 0.66615498  | -4.46567583 | -0.71116501 |
| H | 1.05862701  | -5.88952398 | 1.26557899  |
| H | 0.89531702  | -4.91215086 | 3.54232001  |
| H | 0.44204301  | -2.49346399 | 3.80241799  |
| H | -1.97471094 | -3.55635810 | -0.27585199 |
| H | -3.51711988 | -4.44679880 | -1.94967103 |
| H | -3.28567195 | -3.81373596 | -4.33565903 |
| H | -1.48865700 | -2.23646092 | -5.00183582 |
| H | 0.03143500  | -1.30570197 | -3.30809498 |

Cartesian coordinates for 1c:

|    |             |             |             |
|----|-------------|-------------|-------------|
| Ru | -0.27528700 | 0.51679999  | -0.89691198 |
| N  | -1.66658998 | 1.91288602  | 0.38355699  |
| C  | -3.02964807 | 1.54435003  | 0.08877800  |
| C  | -3.27233195 | 0.88626701  | -1.11694896 |
| N  | -2.14516306 | 0.58565402  | -1.94356704 |
| Cl | -0.11390500 | 2.72394204  | -2.01760292 |
| Cl | 0.48763800  | -0.53711498 | -2.88788009 |
| P  | 1.88518095  | 0.90628499  | -0.02150800 |
| P  | -0.76779997 | -1.60517204 | -0.09669800 |
| C  | 3.12388110  | 1.66666996  | -1.16551101 |
| C  | 2.88297510  | -0.46753299 | 0.68527597  |
| C  | 2.02023602  | 2.16251493  | 1.32931399  |
| C  | -2.28764296 | -2.32403302 | -0.89661801 |
| C  | -1.17064905 | -1.83774400 | 1.68991005  |
| C  | 0.31713101  | -3.06066704 | -0.42571399 |
| C  | 2.98289609  | 1.63006699  | -2.54798102 |
| C  | 4.10162592  | -0.86946797 | 0.14342000  |
| C  | 1.59085000  | 3.45708489  | 1.03216696  |
| C  | -2.21759391 | -2.57378793 | -2.27169609 |
| C  | -2.22832298 | -1.11659503 | 2.24526596  |
| C  | -0.16349199 | -4.34110498 | -0.13517299 |
| C  | 3.95761895  | 2.18212104  | -3.37002301 |
| C  | 4.82084990  | -1.91085303 | 0.71352100  |
| C  | 1.76601899  | 4.48646688  | 1.94119799  |
| C  | -3.28569889 | -3.14394212 | -2.94632196 |
| C  | -2.57822394 | -1.26541805 | 3.57847905  |
| C  | 0.60463202  | -5.46303892 | -0.39164299 |
| C  | 5.08191109  | 2.77899194  | -2.82573891 |
| C  | 4.34172916  | -2.56034088 | 1.83992505  |
| C  | 2.36936307  | 4.24478388  | 3.16753602  |
| C  | -4.44320202 | -3.49044895 | -2.26173902 |
| C  | -1.86189604 | -2.12787890 | 4.39460421  |

|   |             |             |             |
|---|-------------|-------------|-------------|
| C | 1.86617100  | -5.32614899 | -0.95725298 |
| C | 5.23140001  | 2.82366204  | -1.44597495 |
| C | 3.12712097  | -2.17135906 | 2.38578606  |
| C | 2.79542994  | 2.96372890  | 3.47445607  |
| C | -4.51703405 | -3.26258707 | -0.89810401 |
| C | -0.79804403 | -2.83960700 | 3.86201501  |
| C | 2.34399104  | -4.06407022 | -1.26466894 |
| C | 4.26097584  | 2.27456093  | -0.62522399 |
| C | 2.40213490  | -1.14300501 | 1.80571401  |
| C | 2.62624693  | 1.93099499  | 2.56102395  |
| C | -3.44992590 | -2.68435097 | -0.22123501 |
| C | -0.46003401 | -2.70139909 | 2.52297306  |
| C | 1.57343400  | -2.93843007 | -1.00285804 |
| C | -4.09789085 | 1.79989100  | 0.93959600  |
| C | -5.38269901 | 1.40162003  | 0.59388101  |
| C | -5.61814404 | 0.75663501  | -0.60750800 |
| C | -4.55614185 | 0.50410402  | -1.46298099 |
| C | -1.50954497 | 2.60410500  | 1.64141905  |
| C | -1.03494000 | 1.95475495  | 2.76678801  |
| C | -0.94236898 | 2.63837600  | 3.97078800  |
| C | -1.31614101 | 3.97084093  | 4.05296087  |
| C | -1.77056599 | 4.62763786  | 2.91846991  |
| C | -1.86614501 | 3.94649291  | 1.71617198  |
| H | -1.36027503 | 2.57076406  | -0.35304800 |
| H | -1.92070901 | 1.35719395  | -2.57603598 |
| H | -2.30314112 | -0.24735101 | -2.50125790 |
| H | 2.10904098  | 1.17099702  | -2.98653197 |
| H | 4.49501991  | -0.37009400 | -0.73198402 |
| H | 1.13660204  | 3.66078806  | 0.06879800  |
| H | -1.30960798 | -2.32505393 | -2.81195498 |
| H | -2.79524302 | -0.43049300 | 1.62946904  |
| H | -1.15272498 | -4.46511078 | 0.28933400  |
| H | 3.82439804  | 2.14737701  | -4.44483519 |

|   |             |             |             |
|---|-------------|-------------|-------------|
| H | 5.76451778  | -2.21056700 | 0.27286801  |
| H | 1.43211102  | 5.48525000  | 1.68638897  |
| H | -3.20473504 | -3.32991600 | -4.01103592 |
| H | -3.40948701 | -0.69721800 | 3.97897005  |
| H | 0.21380500  | -6.44650412 | -0.15837300 |
| H | 5.83744621  | 3.21356893  | -3.47010899 |
| H | 4.90793180  | -3.36824203 | 2.28779793  |
| H | 2.50981498  | 5.05250311  | 3.87621403  |
| H | -5.27514887 | -3.94421697 | -2.78726506 |
| H | -2.13068891 | -2.24387598 | 5.43779707  |
| H | 2.46675801  | -6.20384121 | -1.16601706 |
| H | 6.10360718  | 3.29205799  | -1.00505996 |
| H | 2.73935390  | -2.67213297 | 3.26539993  |
| H | 3.27701497  | 2.76144195  | 4.42427492  |
| H | -5.40854979 | -3.53843403 | -0.34700400 |
| H | -0.22827300 | -3.51614404 | 4.48848486  |
| H | 3.31961799  | -3.94513607 | -1.72011006 |
| H | 4.39206314  | 2.32486510  | 0.44855300  |
| H | 1.45079398  | -0.85698903 | 2.23762393  |
| H | 2.99789500  | 0.94759202  | 2.81337905  |
| H | -3.53441405 | -2.53333497 | 0.84586501  |
| H | 0.36553901  | -3.27546000 | 2.12541199  |
| H | 1.93907297  | -1.96368802 | -1.28107703 |
| H | -3.92623806 | 2.30339694  | 1.88087499  |
| H | -6.20038080 | 1.60146499  | 1.27561796  |
| H | -6.61822701 | 0.44220099  | -0.87790698 |
| H | -4.71505880 | -0.01867300 | -2.39927292 |
| H | -0.72960800 | 0.92076200  | 2.69352698  |
| H | -0.56322902 | 2.12531400  | 4.84617805  |
| H | -1.23957396 | 4.50057411  | 4.99477100  |
| H | -2.05068207 | 5.67309093  | 2.96754694  |
| H | -2.22690010 | 4.45248890  | 0.82740599  |

Cartesian coordinates for **1d**:

|    |             |             |             |
|----|-------------|-------------|-------------|
| Ru | -0.05709000 | -0.31923601 | 0.96407998  |
| N  | -0.05012700 | -2.18351507 | -0.32358000 |
| C  | -1.09776998 | -3.06714511 | 0.18105900  |
| C  | -1.77744699 | -2.73666406 | 1.34306502  |
| N  | -1.36830902 | -1.57289302 | 2.05615997  |
| Cl | 1.50238395  | -1.48324597 | 2.43746209  |
| Cl | -0.51568198 | 1.23006296  | 2.73483706  |
| P  | 1.80034900  | 0.89420903  | 0.13576999  |
| P  | -1.85626602 | 0.61790299  | -0.17138100 |
| C  | 3.01454496  | 1.53534806  | 1.37761796  |
| C  | 1.54920602  | 2.40662408  | -0.88452399 |
| C  | 3.03659296  | -0.02660700 | -0.89166999 |
| C  | -3.49955797 | 0.12959100  | 0.55252802  |
| C  | -2.08177400 | 0.14757900  | -1.94754303 |
| C  | -2.19958901 | 2.42680192  | -0.22307099 |
| C  | 2.75691795  | 1.56720197  | 2.74225998  |
| C  | 1.93892503  | 3.67537904  | -0.45988300 |
| C  | 3.74728990  | -1.03979599 | -0.24320300 |
| C  | -3.74518800 | 0.52924198  | 1.87067103  |
| C  | -2.30548096 | -1.18704700 | -2.30105591 |
| C  | -3.38401389 | 2.87887192  | -0.81178701 |
| C  | 3.70423198  | 2.07214499  | 3.62562203  |
| C  | 1.73057902  | 4.78831005  | -1.26198494 |
| C  | 4.79580784  | -1.68304300 | -0.87684900 |
| C  | -4.95575809 | 0.24921501  | 2.48510098  |
| C  | -2.39502501 | -1.57949495 | -3.62940311 |
| C  | -3.69984889 | 4.22568321  | -0.82198000 |
| C  | 4.91790819  | 2.54759789  | 3.16104293  |
| C  | 1.13834405  | 4.65475321  | -2.50764894 |
| C  | 5.14995813  | -1.34039605 | -2.17480612 |
| C  | -5.95321989 | -0.42663801 | 1.79554605  |
| C  | -2.26529503 | -0.64250201 | -4.64230585 |

|   |             |             |             |
|---|-------------|-------------|-------------|
| C | -2.84164691 | 5.14416122  | -0.22942400 |
| C | 5.18843794  | 2.51516104  | 1.79881096  |
| C | 0.73650002  | 3.39909196  | -2.93777108 |
| C | 4.43933821  | -0.35252899 | -2.83426809 |
| C | -5.72864294 | -0.80998302 | 0.48411801  |
| C | -2.05793595 | 0.68760997  | -4.31009102 |
| C | -1.67490697 | 4.70326614  | 0.37034699  |
| C | 4.24742985  | 2.01083398  | 0.91859102  |
| C | 0.92937398  | 2.29133391  | -2.12731910 |
| C | 3.39361000  | 0.30393299  | -2.19552588 |
| C | -4.51484394 | -0.53242600 | -0.13288900 |
| C | -1.96929097 | 1.07757294  | -2.98167205 |
| C | -1.35495102 | 3.35119390  | 0.37525100  |
| C | -1.45665801 | -4.21742296 | -0.51704800 |
| C | -2.50118089 | -5.00880003 | -0.07445000 |
| C | -3.19465089 | -4.66254997 | 1.07846105  |
| C | -2.82748699 | -3.53352690 | 1.78589594  |
| C | 1.09052002  | -2.95255899 | -0.76756102 |
| C | 1.71229398  | -3.85270596 | 0.08709500  |
| C | 2.72222590  | -4.66736507 | -0.39756700 |
| C | 3.11939597  | -4.58921099 | -1.72511494 |
| C | 2.50845098  | -3.67496896 | -2.56874704 |
| C | 1.49287200  | -2.86015892 | -2.09269094 |
| H | -0.42152399 | -1.73553503 | -1.15831602 |
| H | -0.69711697 | -1.81236696 | 2.79408598  |
| H | -2.15477300 | -1.08484805 | 2.47336698  |
| H | 1.81735098  | 1.19394505  | 3.11963892  |
| H | 2.40808201  | 3.80066490  | 0.50666898  |
| H | 3.48465204  | -1.30752695 | 0.77362400  |
| H | -2.97716689 | 1.07250202  | 2.41270399  |
| H | -2.45444989 | -1.93707502 | -1.53324795 |
| H | -4.07207584 | 2.17097306  | -1.25910199 |
| H | 3.48383904  | 2.08252311  | 4.68651390  |



|   |             |             |             |
|---|-------------|-------------|-------------|
| H | 2.03847098  | 5.76529598  | -0.90812200 |
| H | 5.34173918  | -2.45595598 | -0.34948501 |
| H | -5.12103605 | 0.57302201  | 3.50614691  |
| H | -2.57740808 | -2.62099504 | -3.86725307 |
| H | -4.62202406 | 4.55849791  | -1.28372002 |
| H | 5.65543604  | 2.93628502  | 3.85385299  |
| H | 0.98434699  | 5.52316904  | -3.13688207 |
| H | 5.97699594  | -1.83964598 | -2.66615701 |
| H | -6.90143299 | -0.64125699 | 2.27401209  |
| H | -2.33609509 | -0.94417799 | -5.68032694 |
| H | -3.09113002 | 6.19885302  | -0.22897400 |
| H | 6.13722181  | 2.87716603  | 1.42020404  |
| H | 0.26811600  | 3.28035688  | -3.90824604 |
| H | 4.70769405  | -0.06891500 | -3.84558702 |
| H | -6.50300121 | -1.32378304 | -0.07362500 |
| H | -1.96957600 | 1.43423796  | -5.09088182 |
| H | -1.00590897 | 5.40911484  | 0.84746897  |
| H | 4.47944593  | 1.98376203  | -0.13922100 |
| H | 0.59618503  | 1.31991005  | -2.47174692 |
| H | 2.88728690  | 1.10249102  | -2.71966505 |
| H | -4.38298607 | -0.82503998 | -1.16513801 |
| H | -1.81510794 | 2.12169695  | -2.74786592 |
| H | -0.46473300 | 3.00915408  | 0.87920702  |
| H | -0.90861201 | -4.48588419 | -1.41195202 |
| H | -2.77595997 | -5.89595509 | -0.63145602 |
| H | -4.01576090 | -5.27615309 | 1.42779100  |
| H | -3.35335708 | -3.25362611 | 2.69134212  |
| H | 1.40643895  | -3.90448594 | 1.12262595  |
| H | 3.20220494  | -5.37050676 | 0.27257901  |
| H | 3.90663695  | -5.23294401 | -2.09815788 |
| H | 2.81609106  | -3.59464192 | -3.60396504 |
| H | 1.00395596  | -2.15662909 | -2.75857210 |

Cartesian coordinates for 1e:

|    |             |             |             |
|----|-------------|-------------|-------------|
| Ru | -0.00482000 | -0.73108000 | -0.16978700 |
| N  | -1.93784297 | -2.07663608 | -0.32318801 |
| C  | -2.52489495 | -2.14439201 | 0.97428203  |
| C  | -1.71189404 | -1.81338894 | 2.06090498  |
| N  | -0.33705699 | -1.44307601 | 1.82052600  |
| Cl | 0.81497300  | -3.08686399 | -0.42972001 |
| Cl | -0.13637701 | -0.45495200 | -2.52967596 |
| P  | 2.24252701  | -0.18808500 | 0.01654800  |
| P  | -0.99874401 | 1.29023600  | 0.15697999  |
| C  | 3.09074807  | -1.49486804 | 1.00702405  |
| C  | 3.05326700  | 1.26961601  | 0.83685702  |
| C  | 3.14786410  | -0.18660700 | -1.58530700 |
| C  | -1.00192499 | 1.91818404  | 1.90425801  |
| C  | -2.79660892 | 1.35605896  | -0.23782800 |
| C  | -0.45217100 | 2.79224992  | -0.77698702 |
| C  | 2.86178303  | -1.52954900 | 2.38247395  |
| C  | 4.33594894  | 1.13121605  | 1.37802696  |
| C  | 2.94843411  | -1.23679197 | -2.48383403 |
| C  | 0.07011400  | 1.59107804  | 2.73280191  |
| C  | -3.77080798 | 0.98421699  | 0.68918598  |
| C  | -0.91122502 | 4.06087685  | -0.41789299 |
| C  | 3.44998789  | -2.49562192 | 3.18282700  |
| C  | 5.00337601  | 2.21644306  | 1.92259300  |
| C  | 3.62426996  | -1.26460505 | -3.69261599 |
| C  | 0.14588501  | 2.04734802  | 4.04098701  |
| C  | -5.11944485 | 1.09825504  | 0.38331601  |
| C  | -0.51243198 | 5.18483019  | -1.12256706 |
| C  | 4.28986311  | -3.44501996 | 2.61777401  |
| C  | 4.40844202  | 3.47019601  | 1.93634403  |
| C  | 4.48460293  | -0.23352100 | -4.04064989 |
| C  | -0.86213797 | 2.84688306  | 4.55525112  |
| C  | -5.51543903 | 1.56381595  | -0.86264098 |

|   |             |             |             |
|---|-------------|-------------|-------------|
| C | 0.34864599  | 5.05936813  | -2.20475292 |
| C | 4.53797102  | -3.40933990 | 1.25512695  |
| C | 3.14384508  | 3.62539601  | 1.39473903  |
| C | 4.66803122  | 0.82672399  | -3.16814494 |
| C | -1.93479502 | 3.19032192  | 3.74597692  |
| C | -4.55411911 | 1.89127004  | -1.80730903 |
| C | 0.80574000  | 3.80447006  | -2.57166100 |
| C | 3.94393897  | -2.44285798 | 0.45536900  |
| C | 2.47807288  | 2.53520799  | 0.85091001  |
| C | 4.00818110  | 0.84874499  | -1.94683397 |
| C | -2.00286007 | 2.73371696  | 2.43833899  |
| C | -3.20619392 | 1.78728497  | -1.49882901 |
| C | 0.41179401  | 2.67727900  | -1.86263704 |
| C | -3.83398199 | -2.54063392 | 1.21789002  |
| C | -4.33884096 | -2.55549908 | 2.50945902  |
| C | -3.53988194 | -2.19031692 | 3.58004904  |
| C | -2.21963596 | -1.83398795 | 3.34862900  |
| C | -2.73765206 | -2.27471089 | -1.49334598 |
| C | -2.28392792 | -3.18932891 | -2.43926597 |
| C | -3.00113201 | -3.40322804 | -3.60366106 |
| C | -4.18091917 | -2.71281099 | -3.83775997 |
| C | -4.62782478 | -1.79863906 | -2.89679098 |
| C | -3.91058302 | -1.57339704 | -1.73165500 |
| H | -1.17751896 | -2.77358603 | -0.36982900 |
| H | 0.25464401  | -2.27695608 | 1.82014298  |
| H | -0.02856900 | -0.84228599 | 2.57529402  |
| H | 2.24484897  | -0.76890701 | 2.84924889  |
| H | 4.82754612  | 0.16783001  | 1.36902905  |
| H | 2.25142598  | -2.02712393 | -2.23955297 |
| H | 0.87978101  | 0.99761099  | 2.32936597  |
| H | -3.48383093 | 0.61700797  | 1.66666603  |
| H | -1.58131301 | 4.18420696  | 0.42233300  |
| H | 3.26155996  | -2.50008297 | 4.25015688  |

|   |             |             |             |
|---|-------------|-------------|-------------|
| H | 5.99651194  | 2.07900500  | 2.33385801  |
| H | 3.45863700  | -2.09025002 | -4.37434101 |
| H | 1.00111794  | 1.78438401  | 4.65252495  |
| H | -5.86037922 | 0.81930000  | 1.12323594  |
| H | -0.87695599 | 6.16122580  | -0.82541800 |
| H | 4.75195694  | -4.20305204 | 3.23861909  |
| H | 4.93023586  | 4.31852913  | 2.36334896  |
| H | 5.00258923  | -0.25265700 | -4.99246502 |
| H | -0.81120902 | 3.20401692  | 5.57685995  |
| H | -6.56860018 | 1.66067898  | -1.09872603 |
| H | 0.65979701  | 5.93829393  | -2.75721502 |
| H | 5.19612694  | -4.14220905 | 0.80376899  |
| H | 2.66341805  | 4.59646702  | 1.39007401  |
| H | 5.32929802  | 1.64384699  | -3.43180799 |
| H | -2.72833896 | 3.81897807  | 4.13271713  |
| H | -4.85104322 | 2.23319697  | -2.79149604 |
| H | 1.47599399  | 3.69104099  | -3.41537404 |
| H | 4.14517784  | -2.43446112 | -0.60731602 |
| H | 1.50034499  | 2.69048595  | 0.42491299  |
| H | 4.17036819  | 1.68524301  | -1.28089094 |
| H | -2.85739589 | 3.01048207  | 1.83556998  |
| H | -2.46621704 | 2.04679108  | -2.24513412 |
| H | 0.75735998  | 1.69743598  | -2.16660500 |
| H | -4.46244907 | -2.82764506 | 0.38637999  |
| H | -5.36634922 | -2.85643411 | 2.67411494  |
| H | -3.93318105 | -2.19015288 | 4.58871412  |
| H | -1.57347000 | -1.56010997 | 4.17571020  |
| H | -1.35139406 | -3.71335912 | -2.26660991 |
| H | -2.62985706 | -4.11270189 | -4.33334684 |
| H | -4.74322510 | -2.88111806 | -4.74820423 |
| H | -5.54187012 | -1.24226499 | -3.06835294 |
| H | -4.26811409 | -0.84971499 | -1.01465094 |

Cartesian coordinates for 1f:

|    |             |             |             |
|----|-------------|-------------|-------------|
| Ru | 0.42393699  | 0.47431400  | -0.08966000 |
| N  | 2.65458798  | 0.11354600  | -0.32927400 |
| C  | 3.20280099  | -0.12208300 | 0.98785299  |
| C  | 2.40431404  | 0.07730200  | 2.10341406  |
| N  | 1.08186698  | 0.60675299  | 1.92637098  |
| Cl | 1.10953701  | 2.81357193  | 0.00267500  |
| Cl | 0.28990301  | 0.51894200  | -2.48308301 |
| P  | -1.71652400 | 1.31066203  | 0.27885199  |
| P  | 0.03458600  | -1.77479398 | -0.22000200 |
| C  | -1.64734101 | 2.67021990  | 1.52908301  |
| C  | -3.20249701 | 0.46974400  | 1.01153803  |
| C  | -2.47732210 | 2.08758497  | -1.20480597 |
| C  | -0.05790800 | -2.71884489 | 1.36954296  |
| C  | 1.38815796  | -2.66497803 | -1.10857904 |
| C  | -1.41213799 | -2.45875812 | -1.14590704 |
| C  | -1.52472901 | 2.31248999  | 2.87157512  |
| C  | -4.23735094 | 1.26570702  | 1.51817596  |
| C  | -1.72419703 | 2.98446989  | -1.96558905 |
| C  | -0.64076400 | -2.09417701 | 2.47177505  |
| C  | 2.56149507  | -3.06580305 | -0.46478701 |
| C  | -1.79436100 | -3.79303098 | -1.00141001 |
| C  | -1.43759894 | 3.27508211  | 3.86523008  |
| C  | -5.38253498 | 0.69855702  | 2.04857206  |
| C  | -2.26708198 | 3.57543898  | -3.09498501 |
| C  | -0.76776499 | -2.74536705 | 3.68967795  |
| C  | 3.60257006  | -3.64755106 | -1.17636299 |
| C  | -2.87263799 | -4.30034685 | -1.70881796 |
| C  | -1.48558295 | 4.62072086  | 3.53064203  |
| C  | -5.52397490 | -0.68296403 | 2.09099102  |
| C  | -3.55341697 | 3.25792098  | -3.50549197 |
| C  | -0.30171099 | -4.04286003 | 3.83449602  |
| C  | 3.49155092  | -3.83246899 | -2.54540300 |

|   |             |             |             |
|---|-------------|-------------|-------------|
| C | -3.58348703 | -3.48260593 | -2.57658505 |
| C | -1.62597203 | 4.98718119  | 2.20129108  |
| C | -4.51266623 | -1.48337698 | 1.59086299  |
| C | -4.29559088 | 2.34194112  | -2.77760196 |
| C | 0.27654701  | -4.68325377 | 2.74893403  |
| C | 2.33698511  | -3.42516804 | -3.19895601 |
| C | -3.20775390 | -2.15774393 | -2.72967100 |
| C | -1.70291996 | 4.02141619  | 1.20790005  |
| C | -3.36676788 | -0.90770501 | 1.05400598  |
| C | -3.76325107 | 1.76293802  | -1.63379502 |
| C | 0.39300001  | -4.03068686 | 1.53043699  |
| C | 1.29678500  | -2.84427691 | -2.49057603 |
| C | -2.13135195 | -1.64623106 | -2.01812100 |
| C | 4.50127602  | -0.59372401 | 1.14986205  |
| C | 4.98664904  | -0.89499998 | 2.40944600  |
| C | 4.17638588  | -0.71852601 | 3.52379990  |
| C | 2.89262605  | -0.22773699 | 3.36908102  |
| C | 3.47870207  | 0.94926703  | -1.16980803 |
| C | 4.13803911  | 2.05896401  | -0.65968901 |
| C | 4.93364096  | 2.82834911  | -1.49278104 |
| C | 5.07442904  | 2.50112391  | -2.83344007 |
| C | 4.41307402  | 1.39183903  | -3.33721995 |
| C | 3.61940289  | 0.61365300  | -2.50938606 |
| H | 2.59745789  | -0.78691101 | -0.80003399 |
| H | 1.11120403  | 1.63186896  | 1.97741199  |
| H | 0.48379400  | 0.26946399  | 2.66958594  |
| H | -1.53966200 | 1.26465702  | 3.15558195  |
| H | -4.14752102 | 2.34430599  | 1.49490499  |
| H | -0.70338202 | 3.20354509  | -1.67909205 |
| H | -1.03399098 | -1.09171104 | 2.35819507  |
| H | 2.66885304  | -2.92978001 | 0.60469002  |
| H | -1.25906205 | -4.44654799 | -0.32504699 |
| H | -1.34820199 | 2.97352791  | 4.90253401  |

|   |             |             |             |
|---|-------------|-------------|-------------|
| H | -6.16821480 | 1.33942604  | 2.43111396  |
| H | -1.66803706 | 4.27260923  | -3.66858292 |
| H | -1.23802805 | -2.23856711 | 4.52428579  |
| H | 4.50021791  | -3.95665503 | -0.65378499 |
| H | -3.15781498 | -5.33800697 | -1.58028400 |
| H | -1.42164803 | 5.37776899  | 4.30304289  |
| H | -6.41902208 | -1.12786305 | 2.50967693  |
| H | -3.97065806 | 3.71339512  | -4.39605999 |
| H | -0.39282200 | -4.55406094 | 4.78538418  |
| H | 4.30195189  | -4.28814316 | -3.10169005 |
| H | -4.42694807 | -3.87922406 | -3.12957692 |
| H | -1.66972494 | 6.03503990  | 1.92892599  |
| H | -4.60610723 | -2.56267095 | 1.60924101  |
| H | -5.29654598 | 2.07355499  | -3.09506202 |
| H | 0.63845497  | -5.70004988 | 2.84709907  |
| H | 2.24334598  | -3.55660892 | -4.27033615 |
| H | -3.75205398 | -1.50866497 | -3.40538692 |
| H | -1.80293798 | 4.32741308  | 0.17554800  |
| H | -2.60571289 | -1.55630505 | 0.65355200  |
| H | -4.36141586 | 1.05023599  | -1.08240700 |
| H | 0.84739703  | -4.55343294 | 0.69879401  |
| H | 0.41004300  | -2.51525807 | -3.01565599 |
| H | -1.82706594 | -0.61698800 | -2.15930200 |
| H | 5.12259007  | -0.72568500 | 0.27238101  |
| H | 5.99534512  | -1.27257895 | 2.52256393  |
| H | 4.54718494  | -0.95713198 | 4.51293516  |
| H | 2.25659895  | -0.07352100 | 4.23368502  |
| H | 4.01922607  | 2.33037901  | 0.37985700  |
| H | 5.43839502  | 3.69761610  | -1.08870101 |
| H | 5.69442511  | 3.10876799  | -3.48140502 |
| H | 4.51041412  | 1.12609005  | -4.38290882 |
| H | 3.08707690  | -0.24119499 | -2.90736890 |

Cartesian coordinates for **1g**:

|    |             |             |             |
|----|-------------|-------------|-------------|
| Ru | -0.08282200 | 0.10039600  | 0.54074103  |
| Cl | 0.73883897  | 0.44327399  | 2.74950790  |
| Cl | -1.41511595 | 0.09869800  | -1.43803096 |
| P  | -0.34421599 | -2.15420794 | 0.88565600  |
| P  | 1.85740805  | 0.25841099  | -0.50260800 |
| C  | -0.36167499 | -3.40670109 | -0.45096099 |
| C  | 0.58756399  | -4.42608404 | -0.49308899 |
| H  | 1.32398295  | -4.51272678 | 0.29602200  |
| C  | 0.59465200  | -5.34246778 | -1.53552699 |
| H  | 1.33945096  | -6.12931919 | -1.55070603 |
| C  | -0.35032299 | -5.25815296 | -2.54585600 |
| H  | -0.35007900 | -5.97997522 | -3.35410810 |
| C  | -1.29700601 | -4.24325895 | -2.51609707 |
| H  | -2.03781295 | -4.16534090 | -3.30320811 |
| C  | -1.30029202 | -3.31984305 | -1.48280501 |
| H  | -2.02484298 | -2.51586509 | -1.48517501 |
| C  | -2.07369089 | -2.16289806 | 1.50952804  |
| C  | -2.42247105 | -1.16834903 | 2.42618895  |
| H  | -1.67153597 | -0.46857300 | 2.77928400  |
| C  | -3.71487904 | -1.08514297 | 2.92199612  |
| H  | -3.96729207 | -0.29735300 | 3.62133503  |
| C  | -4.67463589 | -2.00219202 | 2.52368999  |
| H  | -5.68502903 | -1.93699896 | 2.90944791  |
| C  | -4.33276081 | -3.00733709 | 1.63115895  |
| H  | -5.07320404 | -3.73618698 | 1.32302904  |
| C  | -3.04437995 | -3.08650804 | 1.12447000  |
| H  | -2.79925990 | -3.87744403 | 0.42825100  |
| C  | 0.53688902  | -3.05560398 | 2.21570492  |
| C  | 1.84560502  | -2.73163700 | 2.55277991  |
| H  | 2.33460593  | -1.90035796 | 2.06740093  |
| C  | 2.51962399  | -3.45353293 | 3.52844501  |
| H  | 3.53822708  | -3.18458605 | 3.78079200  |



|   |             |             |             |
|---|-------------|-------------|-------------|
| C | 1.88876104  | -4.49912214 | 4.18279505  |
| H | 2.41264701  | -5.05703497 | 4.95009613  |
| C | 0.57804602  | -4.82343578 | 3.85891604  |
| H | 0.07461300  | -5.63467979 | 4.37138605  |
| C | -0.09308100 | -4.10756111 | 2.88156509  |
| H | -1.11713398 | -4.36612701 | 2.64112806  |
| C | 2.14085293  | -0.45267400 | -2.17258692 |
| C | 1.29131305  | -1.39007795 | -2.73864007 |
| H | 0.40586099  | -1.69522703 | -2.20571494 |
| C | 1.55735600  | -1.91364002 | -3.99826908 |
| H | 0.87916398  | -2.64345908 | -4.42340422 |
| C | 2.67461109  | -1.50052202 | -4.70283985 |
| H | 2.88054609  | -1.90572906 | -5.68663788 |
| C | 3.52905989  | -0.55549997 | -4.14676523 |
| H | 4.40245724  | -0.22078501 | -4.69376421 |
| C | 3.26349592  | -0.03412100 | -2.89335895 |
| H | 3.93407297  | 0.70613497  | -2.47299600 |
| C | 2.18284893  | 2.02294207  | -0.92976499 |
| C | 1.33727598  | 2.58139801  | -1.89439404 |
| H | 0.56173497  | 1.96792400  | -2.34281707 |
| C | 1.47814095  | 3.90322399  | -2.28216505 |
| H | 0.80794698  | 4.31754494  | -3.02594495 |
| C | 2.47312188  | 4.69142008  | -1.71744299 |
| H | 2.58554196  | 5.72569609  | -2.01943707 |
| C | 3.32293606  | 4.14498520  | -0.77029198 |
| H | 4.10925913  | 4.74870682  | -0.33264399 |
| C | 3.18101311  | 2.81891298  | -0.37727100 |
| H | 3.87025595  | 2.40908599  | 0.34822401  |
| C | 3.36698890  | -0.29864699 | 0.37956199  |
| C | 4.11349201  | -1.37809598 | -0.09376200 |
| H | 3.82465410  | -1.87803304 | -1.00872004 |
| C | 5.22874594  | -1.82685602 | 0.59888899  |
| H | 5.79219723  | -2.66892910 | 0.21507999  |

|   |             |             |             |
|---|-------------|-------------|-------------|
| C | 5.62013102  | -1.20158303 | 1.77222204  |
| H | 6.49501419  | -1.54813600 | 2.30962491  |
| C | 4.87788486  | -0.13565800 | 2.26020908  |
| H | 5.16271782  | 0.34906399  | 3.18631601  |
| C | 3.75505400  | 0.30509499  | 1.57801497  |
| H | 3.15470099  | 1.09628797  | 2.00427604  |
| N | -2.39875102 | 3.11951995  | -1.08152795 |
| C | -2.71103811 | 3.13363791  | 0.27981400  |
| C | -1.74170196 | 2.67805505  | 1.18557799  |
| N | -0.45980501 | 2.27631903  | 0.69197899  |
| C | -3.93904805 | 3.56225109  | 0.77979797  |
| C | -4.19918919 | 3.54385400  | 2.13906288  |
| C | -3.23656797 | 3.08472705  | 3.02643800  |
| C | -2.01186800 | 2.65046096  | 2.54683089  |
| C | -2.93200898 | 3.96183610  | -2.04618907 |
| C | -3.28758907 | 5.28576708  | -1.77404296 |
| C | -3.75443912 | 6.10594606  | -2.78790689 |
| C | -3.86837292 | 5.63933516  | -4.08993816 |
| C | -3.50539804 | 4.32828283  | -4.36560917 |
| C | -3.04816103 | 3.49534988  | -3.35952592 |
| H | -2.10212398 | 2.20351291  | -1.41628897 |
| H | 0.26093799  | 2.52915502  | 1.36106598  |
| H | -0.27828401 | 2.75027394  | -0.18916699 |
| H | -4.69524479 | 3.90315390  | 0.08438700  |
| H | -5.16269207 | 3.87964606  | 2.50316691  |
| H | -3.43261099 | 3.06994200  | 4.09145880  |
| H | -1.24474800 | 2.29076600  | 3.22242093  |
| H | -3.18432403 | 5.67423916  | -0.76885998 |
| H | -4.02387810 | 7.12967110  | -2.55444694 |
| H | -4.23315096 | 6.28723001  | -4.87699318 |
| H | -3.58686304 | 3.94289494  | -5.37540579 |
| H | -2.77676296 | 2.46865892  | -3.58044195 |

SMD/PCM (CHCl<sub>3</sub>) Cartesian coordinates for 1:

|    |             |             |             |
|----|-------------|-------------|-------------|
| Ru | -0.15007775 | 0.70109522  | 0.08019862  |
| Cl | -0.06929033 | 1.09733438  | 2.47864842  |
| Cl | -0.30015132 | 1.00850046  | -2.30841660 |
| P  | -0.78856707 | -1.54790723 | 0.30012658  |
| P  | 2.11915302  | 0.36132708  | -0.22158490 |
| C  | -1.19547796 | -2.51658964 | -1.21594799 |
| C  | -0.91876143 | -3.87630248 | -1.36154008 |
| H  | -0.38769540 | -4.41153574 | -0.58579081 |
| C  | -1.33014286 | -4.56704998 | -2.49311447 |
| H  | -1.10253394 | -5.62294865 | -2.58703136 |
| C  | -2.03564191 | -3.91309524 | -3.49266171 |
| H  | -2.35796595 | -4.45328903 | -4.37573814 |
| C  | -2.32791924 | -2.56409383 | -3.35252714 |
| H  | -2.88110828 | -2.04296851 | -4.12568188 |
| C  | -1.90944147 | -1.87120986 | -2.22582889 |
| H  | -2.12970901 | -0.81643212 | -2.13558078 |
| C  | -2.37240553 | -1.79913700 | 1.23573732  |
| C  | -2.60488510 | -1.08700895 | 2.41463280  |
| H  | -1.85696757 | -0.38774589 | 2.77289557  |
| C  | -3.77363610 | -1.26797676 | 3.14283824  |
| H  | -3.92811227 | -0.70023257 | 4.05368948  |
| C  | -4.73464870 | -2.16897273 | 2.70868802  |
| H  | -5.65003490 | -2.30835271 | 3.27237153  |
| C  | -4.51039839 | -2.89236116 | 1.54636681  |
| H  | -5.25051355 | -3.60324883 | 1.19621956  |
| C  | -3.34207869 | -2.71141410 | 0.81856483  |
| H  | -3.20034790 | -3.28456640 | -0.08742836 |
| C  | 0.30050015  | -2.72523713 | 1.21100330  |
| C  | 1.46536446  | -3.19499612 | 0.60273927  |
| H  | 1.73294497  | -2.86130309 | -0.39168629 |
| C  | 2.28813243  | -4.10843849 | 1.24108791  |
| H  | 3.18155336  | -4.46351004 | 0.74079394  |

|   |             |             |             |
|---|-------------|-------------|-------------|
| C | 1.97482717  | -4.55612230 | 2.51640439  |
| H | 2.61931181  | -5.26807642 | 3.01923823  |
| C | 0.83364272  | -4.08108282 | 3.14268255  |
| H | 0.57805651  | -4.41830254 | 4.14098740  |
| C | 0.00036072  | -3.17979741 | 2.49300933  |
| H | -0.89555717 | -2.84281516 | 2.99652982  |
| C | 2.71084023  | -0.36957037 | -1.80845296 |
| C | 1.93933237  | -1.32900023 | -2.45700240 |
| H | 0.95281333  | -1.56353688 | -2.08349252 |
| C | 2.39779210  | -1.96230745 | -3.60302997 |
| H | 1.77538764  | -2.70539093 | -4.08839750 |
| C | 3.63542461  | -1.63112247 | -4.13451290 |
| H | 3.99348783  | -2.12000704 | -5.03347111 |
| C | 4.40561867  | -0.65730679 | -3.51534104 |
| H | 5.36883497  | -0.37867421 | -3.92784500 |
| C | 3.94629741  | -0.03136153 | -2.36501598 |
| H | 4.56116724  | 0.73227882  | -1.90547121 |
| C | 2.94993544  | 2.00838256  | -0.27163839 |
| C | 2.88575888  | 2.78741527  | -1.42989981 |
| H | 2.40728402  | 2.39115906  | -2.31830144 |
| C | 3.42314506  | 4.06561804  | -1.45390916 |
| H | 3.37067771  | 4.65141010  | -2.36473751 |
| C | 4.02278757  | 4.59379578  | -0.31795898 |
| H | 4.44279194  | 5.59293842  | -0.33714497 |
| C | 4.07928085  | 3.83507204  | 0.84158802  |
| H | 4.54332209  | 4.23779535  | 1.73483324  |
| C | 3.54793215  | 2.55104637  | 0.86475658  |
| H | 3.60476017  | 1.96994555  | 1.77713645  |
| C | 3.19996333  | -0.49861002 | 1.00985646  |
| C | 4.47370911  | -0.96224183 | 0.67611229  |
| H | 4.83273935  | -0.90085471 | -0.34164682 |
| C | 5.30292606  | -1.51923227 | 1.63738573  |
| H | 6.28790379  | -1.87279892 | 1.35308087  |

|   |             |             |             |
|---|-------------|-------------|-------------|
| C | 4.87554598  | -1.62494981 | 2.95355773  |
| H | 5.52541971  | -2.05852938 | 3.70552921  |
| C | 3.60779238  | -1.18073487 | 3.29331589  |
| H | 3.25470281  | -1.26798511 | 4.31471777  |
| C | 2.77552223  | -0.62706840 | 2.32995582  |
| H | 1.78770447  | -0.28458232 | 2.60606861  |
| N | -2.29106092 | 1.51622438  | 0.33942032  |
| C | -2.19038391 | 2.91343808  | 0.72333109  |
| C | -0.98487842 | 3.56794095  | 0.55592853  |
| N | 0.12245560  | 2.82877374  | 0.02082252  |
| C | -3.27961850 | 3.59054780  | 1.25626647  |
| C | -3.15657210 | 4.91885710  | 1.62754476  |
| C | -1.94409335 | 5.57621050  | 1.46033502  |
| C | -0.86033422 | 4.90161943  | 0.92399794  |
| C | -3.33861899 | 1.31025720  | -0.63302773 |
| C | -3.34221339 | 2.03519559  | -1.81959260 |
| C | -4.35456896 | 1.84184957  | -2.74467254 |
| C | -5.37062073 | 0.92645925  | -2.50033188 |
| C | -5.37411833 | 0.21788660  | -1.30926764 |
| C | -4.36796331 | 0.41514179  | -0.37313038 |
| H | -2.52453351 | 0.98343307  | 1.17381787  |
| H | 0.97571254  | 3.10324597  | 0.49620441  |
| H | 0.24984635  | 3.03246593  | -0.97024715 |
| H | -4.22349215 | 3.07183528  | 1.38032353  |
| H | -4.00537491 | 5.44079304  | 2.05328035  |
| H | -1.84361064 | 6.61513996  | 1.75075889  |
| H | 0.09134851  | 5.40547562  | 0.79263473  |
| H | -2.55049276 | 2.74221873  | -2.02232409 |
| H | -4.34522104 | 2.40980077  | -3.66794634 |
| H | -6.15828276 | 0.77608442  | -3.22941256 |
| H | -6.16836166 | -0.48782617 | -1.09460473 |
| H | -4.38990402 | -0.12852591 | 0.56282330  |

SMD/PCM (CHCl<sub>3</sub>) Cartesian coordinates for **1b**:

|    |             |             |             |
|----|-------------|-------------|-------------|
| Ru | 0.11395046  | 0.27527004  | -0.03332962 |
| N  | 0.09973326  | -1.81686997 | -0.75839573 |
| C  | 0.32438898  | -2.68335533 | 0.38515803  |
| C  | 0.28496656  | -2.15128899 | 1.66494977  |
| N  | 0.10350619  | -0.72747803 | 1.82903922  |
| Cl | 0.16712260  | 1.14293420  | -2.30757022 |
| Cl | 0.39199725  | 2.47114825  | 0.95085943  |
| P  | -2.24013519 | 0.72207010  | 0.22104669  |
| P  | 2.49114847  | 0.32113048  | -0.08759052 |
| C  | -3.52809167 | -0.57238793 | -0.08047608 |
| C  | -2.83126235 | 2.15511703  | -0.75239110 |
| C  | -2.82133794 | 1.16887641  | 1.92865813  |
| C  | 3.22702980  | 0.34856337  | 1.59312952  |
| C  | 3.40146041  | 1.70234561  | -0.90050095 |
| C  | 3.31160188  | -1.08584368 | -0.95164371 |
| C  | -3.60970473 | -1.61462092 | 0.84646082  |
| C  | -2.88333225 | 2.07272816  | -2.14491248 |
| C  | -1.95081627 | 1.47141826  | 2.97236729  |
| C  | 3.23704982  | -0.78785706 | 2.40590429  |
| C  | 2.77230501  | 2.86316395  | -1.33633780 |
| C  | 2.93455315  | -1.26131606 | -2.28770351 |
| C  | -4.59856939 | -2.57960868 | 0.75842363  |
| C  | -3.31261969 | 3.15300775  | -2.90076971 |
| C  | -2.43373632 | 1.78212988  | 4.23974752  |
| C  | 3.70238113  | -0.72851419 | 3.71318316  |
| C  | 3.50839520  | 3.87282014  | -1.94495177 |
| C  | 3.48120213  | -2.27875090 | -3.05539465 |
| C  | -5.52629519 | -2.53128886 | -0.27391320 |
| C  | -3.66598868 | 4.34400320  | -2.28225946 |
| C  | -3.79661012 | 1.81458747  | 4.48005390  |
| C  | 4.15455770  | 0.47321230  | 4.23664999  |
| C  | 4.87659502  | 3.73751140  | -2.12099838 |

|   |             |             |             |
|---|-------------|-------------|-------------|
| C | 4.41864538  | -3.13959360 | -2.50142574 |
| C | -5.44846106 | -1.51266515 | -1.20941651 |
| C | -3.58614731 | 4.44717550  | -0.90142947 |
| C | -4.67874050 | 1.53635836  | 3.44279337  |
| C | 4.13964987  | 1.61224699  | 3.44363928  |
| C | 5.51391554  | 2.58364916  | -1.68316019 |
| C | 4.81393147  | -2.96333146 | -1.18377411 |
| C | -4.46088505 | -0.53964692 | -1.11135566 |
| C | -3.17210793 | 3.36116147  | -0.14273085 |
| C | -4.19589996 | 1.21224689  | 2.18646193  |
| C | 3.67953730  | 1.55204046  | 2.13691783  |
| C | 4.78086376  | 1.57497394  | -1.07864177 |
| C | 4.26772785  | -1.94479036 | -0.41346040 |
| C | 0.61607677  | -4.03443861 | 0.21625938  |
| C | 0.83077967  | -4.84818029 | 1.31354940  |
| C | 0.74880683  | -4.32084990 | 2.59695077  |
| C | 0.48250288  | -2.97466278 | 2.76926374  |
| C | -0.84064889 | -2.33996677 | -1.73242652 |
| C | -1.86137891 | -3.21132660 | -1.37920725 |
| C | -2.70694971 | -3.72278547 | -2.35318565 |
| C | -2.54469705 | -3.37271738 | -3.68437552 |
| C | -1.52699637 | -2.49682474 | -4.03396749 |
| C | -0.67727023 | -1.98477376 | -3.06689477 |
| H | 0.98833257  | -1.75235343 | -1.25396395 |
| H | 0.85808527  | -0.36752346 | 2.41135669  |
| H | -0.75005615 | -0.53897244 | 2.34496021  |
| H | -2.91181469 | -1.66235864 | 1.67552984  |
| H | -2.56655574 | 1.16849709  | -2.64551687 |
| H | -0.88753510 | 1.52538681  | 2.78141403  |
| H | 2.88880062  | -1.73839188 | 2.02119327  |
| H | 1.70694458  | 2.96877265  | -1.20196950 |
| H | 2.22315764  | -0.56789267 | -2.72903848 |
| H | -4.64739132 | -3.36830592 | 1.50093091  |

|   |             |             |             |
|---|-------------|-------------|-------------|
| H | -3.35594797 | 3.06655884  | -3.98072386 |
| H | -1.73318112 | 2.01167083  | 5.03487396  |
| H | 3.70983434  | -1.62626827 | 4.32096004  |
| H | 3.00216889  | 4.76973963  | -2.28392601 |
| H | 3.17629910  | -2.39411139 | -4.08931875 |
| H | -6.30547285 | -3.28163266 | -0.34419420 |
| H | -3.99448109 | 5.19048071  | -2.87488556 |
| H | -4.17392111 | 2.06111073  | 5.46603012  |
| H | 4.51724052  | 0.52278227  | 5.25688553  |
| H | 5.44685173  | 4.52611589  | -2.59925008 |
| H | 4.84750938  | -3.93675327 | -3.09756303 |
| H | -6.16787004 | -1.46064544 | -2.01889133 |
| H | -3.84573627 | 5.37658167  | -0.40706095 |
| H | -5.74907494 | 1.56988204  | 3.61292171  |
| H | 4.48557663  | 2.55809379  | 3.84498763  |
| H | 6.58369017  | 2.46591473  | -1.81443787 |
| H | 5.55900764  | -3.61937475 | -0.74782193 |
| H | -4.44747114 | 0.26148647  | -1.83746207 |
| H | -3.11443210 | 3.46177721  | 0.93295920  |
| H | -4.90200806 | 0.99157119  | 1.39556742  |
| H | 3.66760278  | 2.45066714  | 1.53475344  |
| H | 5.29363203  | 0.67910624  | -0.74839705 |
| H | 4.61224365  | -1.81752884 | 0.60412395  |
| H | 0.66631883  | -4.44648647 | -0.78457391 |
| H | 1.06215250  | -5.89640856 | 1.16744888  |
| H | 0.90807819  | -4.95457077 | 3.46104383  |
| H | 0.44508886  | -2.54243588 | 3.76326704  |
| H | -1.99725127 | -3.50867629 | -0.34985059 |
| H | -3.49736261 | -4.40343857 | -2.06055713 |
| H | -3.20419860 | -3.77873373 | -4.44248819 |
| H | -1.38489640 | -2.21009445 | -5.06984472 |
| H | 0.09730310  | -1.28274286 | -3.34092402 |



SMD/PCM (CHCl<sub>3</sub>) Cartesian coordinates for 1c:

|    |             |             |             |
|----|-------------|-------------|-------------|
| Ru | -0.29476452 | 0.52077031  | -0.90708303 |
| N  | -1.64857602 | 1.87994361  | 0.39497057  |
| C  | -3.02477431 | 1.53602195  | 0.10825334  |
| C  | -3.28753281 | 0.90162319  | -1.10286009 |
| N  | -2.16906810 | 0.55888134  | -1.93354428 |
| Cl | -0.15653376 | 2.74387097  | -2.03893852 |
| Cl | 0.48460144  | -0.52204269 | -2.92141199 |
| P  | 1.88004363  | 0.91626239  | -0.01743886 |
| P  | -0.78536105 | -1.60977602 | -0.09826621 |
| C  | 3.13311791  | 1.64832175  | -1.17281806 |
| C  | 2.86384630  | -0.44836035 | 0.72740316  |
| C  | 2.03759646  | 2.20603323  | 1.30166936  |
| C  | -2.29009891 | -2.34560323 | -0.91382974 |
| C  | -1.20251131 | -1.84472764 | 1.68290877  |
| C  | 0.31846792  | -3.05380583 | -0.42136276 |
| C  | 2.97140265  | 1.65020192  | -2.55346298 |
| C  | 4.08806038  | -0.87110233 | 0.21421359  |
| C  | 1.59756625  | 3.49262166  | 0.98806256  |
| C  | -2.20968866 | -2.59055305 | -2.28923965 |
| C  | -2.28461289 | -1.14937413 | 2.22445321  |
| C  | -0.15177867 | -4.34121704 | -0.14291254 |
| C  | 3.94247484  | 2.20356727  | -3.38078332 |
| C  | 4.80338430  | -1.88796782 | 0.83230084  |
| C  | 1.80535674  | 4.54658794  | 1.86211634  |
| C  | -3.26190066 | -3.18065786 | -2.97268653 |
| C  | -2.65417004 | -1.31342328 | 3.55064631  |
| C  | 0.62718129  | -5.45466948 | -0.40615043 |
| C  | 5.09067202  | 2.76008892  | -2.84169030 |
| C  | 4.31159830  | -2.49489641 | 1.97743332  |
| C  | 2.45444131  | 4.33701468  | 3.07129836  |
| C  | -4.41550159 | -3.55288839 | -2.29484010 |
| C  | -1.93409085 | -2.16756201 | 4.37309599  |

|   |             |             |             |
|---|-------------|-------------|-------------|
| C | 1.89097905  | -5.30256796 | -0.96477997 |
| C | 5.26430178  | 2.76431203  | -1.46329796 |
| C | 3.08804512  | -2.08988571 | 2.49195552  |
| C | 2.88898301  | 3.06298828  | 3.39703178  |
| C | -4.50018597 | -3.33127260 | -0.93028796 |
| C | -0.84657276 | -2.85450339 | 3.85463786  |
| C | 2.36081648  | -4.03324032 | -1.25688624 |
| C | 4.29505444  | 2.21569133  | -0.63980931 |
| C | 2.36915016  | -1.08410060 | 1.86536050  |
| C | 2.68569756  | 2.00679588  | 2.51775599  |
| C | -3.44891524 | -2.73225379 | -0.24618913 |
| C | -0.48711190 | -2.69790053 | 2.52270555  |
| C | 1.57849300  | -2.91684175 | -0.98682564 |
| C | -4.08385468 | 1.81113315  | 0.96517724  |
| C | -5.38115263 | 1.46599185  | 0.61006832  |
| C | -5.63908005 | 0.86186481  | -0.60938227 |
| C | -4.58485794 | 0.58253455  | -1.46567881 |
| C | -1.47164130 | 2.53862476  | 1.67156124  |
| C | -0.99581176 | 1.85708141  | 2.77616143  |
| C | -0.88221329 | 2.51103830  | 3.99528384  |
| C | -1.23922205 | 3.84586525  | 4.11182165  |
| C | -1.70005858 | 4.53371811  | 2.99779201  |
| C | -1.81423140 | 3.88257194  | 1.78030384  |
| H | -1.36878538 | 2.56914210  | -0.31896693 |
| H | -1.99642229 | 1.27761030  | -2.63713288 |
| H | -2.34775829 | -0.31372219 | -2.42024612 |
| H | 2.07917452  | 1.22147787  | -2.98500013 |
| H | 4.49384546  | -0.40933168 | -0.67609364 |
| H | 1.10480809  | 3.67170310  | 0.03914060  |
| H | -1.30617654 | -2.32043481 | -2.82571268 |
| H | -2.85687399 | -0.47271103 | 1.60363007  |
| H | -1.14051950 | -4.47992945 | 0.27831244  |
| H | 3.79182839  | 2.19877076  | -4.45474386 |

|   |             |             |             |
|---|-------------|-------------|-------------|
| H | 5.75247192  | -2.20320439 | 0.41355172  |
| H | 1.45895302  | 5.53855658  | 1.59534502  |
| H | -3.17410040 | -3.35728550 | -4.03885555 |
| H | -3.50426507 | -0.76568198 | 3.94130087  |
| H | 0.24459937  | -6.44370556 | -0.18023092 |
| H | 5.84556484  | 3.19358754  | -3.48827195 |
| H | 4.87562370  | -3.28219962 | 2.46432877  |
| H | 2.61990523  | 5.16318083  | 3.75348759  |
| H | -5.23707485 | -4.01875448 | -2.82680631 |
| H | -2.21938515 | -2.29600120 | 5.41087818  |
| H | 2.50020742  | -6.17396212 | -1.17735803 |
| H | 6.15622044  | 3.19884562  | -1.02576911 |
| H | 2.69286251  | -2.55660534 | 3.38708878  |
| H | 3.40095878  | 2.88371897  | 4.33602428  |
| H | -5.38903618 | -3.62630105 | -0.38390315 |
| H | -0.27289996 | -3.52271652 | 4.48707056  |
| H | 3.33983874  | -3.90335274 | -1.70324588 |
| H | 4.44712496  | 2.23700690  | 0.43226185  |
| H | 1.41517901  | -0.78124017 | 2.27961493  |
| H | 3.06157947  | 1.02931941  | 2.78652096  |
| H | -3.54388118 | -2.58764458 | 0.82079870  |
| H | 0.35826012  | -3.25171661 | 2.13853097  |
| H | 1.94010973  | -1.93535364 | -1.24605370 |
| H | -3.89864612 | 2.28769803  | 1.91761601  |
| H | -6.19246387 | 1.67866826  | 1.29631543  |
| H | -6.65126371 | 0.59714562  | -0.89005274 |
| H | -4.76145649 | 0.09686406  | -2.41888309 |
| H | -0.71021855 | 0.81987965  | 2.67753530  |
| H | -0.50294214 | 1.97249067  | 4.85581732  |
| H | -1.14781523 | 4.35240841  | 5.06564522  |
| H | -1.96937692 | 5.58090115  | 3.07432532  |
| H | -2.18058753 | 4.41607618  | 0.90938002  |

SMD/PCM (CHCl<sub>3</sub>) Cartesian coordinates for **1d**:

|    |             |             |             |
|----|-------------|-------------|-------------|
| Ru | -0.06306731 | -0.32900047 | 0.97505933  |
| N  | -0.07312745 | -2.17599797 | -0.32279897 |
| C  | -1.10555625 | -3.07543063 | 0.19148372  |
| C  | -1.77520990 | -2.75497794 | 1.36008692  |
| N  | -1.39283085 | -1.56623435 | 2.05645084  |
| Cl | 1.49438155  | -1.51588857 | 2.46308351  |
| Cl | -0.48991135 | 1.22912455  | 2.76791525  |
| P  | 1.79788697  | 0.89791483  | 0.12856676  |
| P  | -1.86253524 | 0.60655963  | -0.17975207 |
| C  | 3.01951146  | 1.53731668  | 1.37226319  |
| C  | 1.54372871  | 2.41707778  | -0.88085061 |
| C  | 3.04868984  | -0.00895203 | -0.89600676 |
| C  | -3.51141739 | 0.14524694  | 0.54943603  |
| C  | -2.07881260 | 0.11187198  | -1.94744408 |
| C  | -2.19941998 | 2.41782045  | -0.25221947 |
| C  | 2.79249740  | 1.51420426  | 2.74265838  |
| C  | 1.90212142  | 3.68756652  | -0.43316126 |
| C  | 3.73866224  | -1.04166865 | -0.25669795 |
| C  | -3.74699354 | 0.54560035  | 1.86923492  |
| C  | -2.34644508 | -1.21987092 | -2.28049684 |
| C  | -3.36848831 | 2.86570311  | -0.87515384 |
| C  | 3.75235128  | 1.99290478  | 3.62840652  |
| C  | 1.70491350  | 4.80587053  | -1.23081982 |
| C  | 4.80722046  | -1.66862071 | -0.87383246 |
| C  | -4.96953821 | 0.30998370  | 2.47946072  |
| C  | -2.44886374 | -1.62908852 | -3.60303760 |
| C  | -3.69400644 | 4.21080303  | -0.88866621 |
| C  | 4.95159340  | 2.50175452  | 3.15930009  |
| C  | 1.15609431  | 4.67546463  | -2.49699569 |
| C  | 5.20053053  | -1.29087090 | -2.15115881 |
| C  | -5.98868704 | -0.32504994 | 1.78241813  |
| C  | -2.28583169 | -0.71117043 | -4.62886810 |

|   |             |             |             |
|---|-------------|-------------|-------------|
| C | -2.86081243 | 5.13267946  | -0.26457664 |
| C | 5.19034386  | 2.53157330  | 1.79041457  |
| C | 0.78250158  | 3.41864991  | -2.95027041 |
| C | 4.50760221  | -0.28645793 | -2.80527353 |
| C | -5.77238750 | -0.71435815 | 0.47063377  |
| C | -2.02976513 | 0.61612940  | -4.31738234 |
| C | -1.70664573 | 4.69702959  | 0.36417800  |
| C | 4.23639631  | 2.05013847  | 0.90998703  |
| C | 0.96282786  | 2.30541086  | -2.14313865 |
| C | 3.44452810  | 0.35499898  | -2.17959642 |
| C | -4.54723644 | -0.47833660 | -0.14184514 |
| C | -1.93020332 | 1.02232683  | -2.99436760 |
| C | -1.37683427 | 3.34629083  | 0.37001914  |
| C | -1.45646155 | -4.23194456 | -0.50170571 |
| C | -2.47348523 | -5.04507637 | -0.03402949 |
| C | -3.14637971 | -4.71650934 | 1.13695085  |
| C | -2.79378247 | -3.57532787 | 1.83261275  |
| C | 1.07022345  | -2.93295479 | -0.78825104 |
| C | 1.69649255  | -3.85405064 | 0.04082568  |
| C | 2.70953655  | -4.65287638 | -0.46478054 |
| C | 3.10528636  | -4.53809881 | -1.79066038 |
| C | 2.48373699  | -3.60958552 | -2.61139250 |
| C | 1.46676350  | -2.80939317 | -2.11247802 |
| H | -0.46092236 | -1.73517179 | -1.15456378 |
| H | -0.78999621 | -1.79605246 | 2.85049963  |
| H | -2.20763779 | -1.07825136 | 2.41736555  |
| H | 1.86343157  | 1.11612391  | 3.12019587  |
| H | 2.33705950  | 3.81509876  | 0.54903501  |
| H | 3.44152093  | -1.34110141 | 0.74147671  |
| H | -2.96304655 | 1.06099987  | 2.41472483  |
| H | -2.52029920 | -1.95331717 | -1.50236094 |
| H | -4.03791952 | 2.15766263  | -1.34961176 |
| H | 3.55460429  | 1.95953488  | 4.69418573  |

|   |             |             |             |
|---|-------------|-------------|-------------|
| H | 1.98726845  | 5.78362417  | -0.85697860 |
| H | 5.33691502  | -2.45771575 | -0.35321930 |
| H | -5.12654448 | 0.63279063  | 3.50268388  |
| H | -2.66680884 | -2.66745567 | -3.82516885 |
| H | -4.60333920 | 4.53950500  | -1.37906456 |
| H | 5.69976711  | 2.87065744  | 3.85218358  |
| H | 1.01365089  | 5.54736948  | -3.12503719 |
| H | 6.04018688  | -1.77987170 | -2.63220119 |
| H | -6.94594765 | -0.50757706 | 2.25719905  |
| H | -2.36664772 | -1.02496064 | -5.66312742 |
| H | -3.11808586 | 6.18598890  | -0.26576799 |
| H | 6.12521744  | 2.92422485  | 1.40637481  |
| H | 0.35025254  | 3.30399251  | -3.93806195 |
| H | 4.80215836  | 0.02070759  | -3.80283689 |
| H | -6.56294537 | -1.19861698 | -0.09137947 |
| H | -1.91336572 | 1.34706271  | -5.10981083 |
| H | -1.05518126 | 5.40764523  | 0.85958266  |
| H | 4.44827127  | 2.07075405  | -0.15225899 |
| H | 0.65598893  | 1.33370936  | -2.51021981 |
| H | 2.95320153  | 1.16499913  | -2.70026851 |
| H | -4.42498064 | -0.77105939 | -1.17530096 |
| H | -1.74268842 | 2.06422281  | -2.77652788 |
| H | -0.49383751 | 3.00883603  | 0.88979936  |
| H | -0.93067956 | -4.49112701 | -1.41257298 |
| H | -2.74353814 | -5.93732929 | -0.58633476 |
| H | -3.94246578 | -5.35116863 | 1.50763202  |
| H | -3.30497193 | -3.30812120 | 2.75114584  |
| H | 1.38669705  | -3.94499707 | 1.07247829  |
| H | 3.19253540  | -5.37251043 | 0.18640712  |
| H | 3.89544177  | -5.16861820 | -2.18124151 |
| H | 2.78405595  | -3.50693154 | -3.64726114 |
| H | 0.97115982  | -2.09728408 | -2.76397347 |

SMD/PCM (CHCl<sub>3</sub>) Cartesian coordinates for 1e:

|    |             |             |             |
|----|-------------|-------------|-------------|
| Ru | -0.00799294 | -0.72048652 | -0.19512500 |
| N  | -1.94999123 | -2.05884910 | -0.36373782 |
| C  | -2.53087902 | -2.15826082 | 0.93936294  |
| C  | -1.72758591 | -1.81718183 | 2.02708244  |
| N  | -0.36758259 | -1.37900019 | 1.79441094  |
| Cl | 0.80720878  | -3.09147310 | -0.45177186 |
| Cl | -0.09346277 | -0.46465713 | -2.57745409 |
| P  | 2.25440717  | -0.19622235 | 0.02708301  |
| P  | -0.99664789 | 1.31863713  | 0.14344381  |
| C  | 3.09389806  | -1.51384354 | 1.01211858  |
| C  | 3.05308199  | 1.26049185  | 0.86026353  |
| C  | 3.18644595  | -0.19451836 | -1.56241035 |
| C  | -0.96993786 | 1.95357394  | 1.88799846  |
| C  | -2.80582500 | 1.38188100  | -0.20278126 |
| C  | -0.46830010 | 2.81349397  | -0.81220806 |
| C  | 2.79859281  | -1.60619426 | 2.37249207  |
| C  | 4.29136753  | 1.11586738  | 1.49431717  |
| C  | 3.00865650  | -1.24872971 | -2.46062899 |
| C  | 0.10529859  | 1.62757742  | 2.71342969  |
| C  | -3.73922467 | 0.95688814  | 0.74385732  |
| C  | -0.94714284 | 4.08091021  | -0.47340363 |
| C  | 3.39885974  | -2.56490135 | 3.17370629  |
| C  | 4.94267035  | 2.20695448  | 2.04967570  |
| C  | 3.72156954  | -1.29185188 | -3.64803672 |
| C  | 0.18550983  | 2.08465552  | 4.02160883  |
| C  | -5.10045671 | 1.06593311  | 0.49879563  |
| C  | -0.56819886 | 5.19970274  | -1.19771194 |
| C  | 4.32230663  | -3.44561744 | 2.62658119  |
| C  | 4.37779379  | 3.47232842  | 1.97722471  |
| C  | 4.60324717  | -0.27041140 | -3.97525024 |
| C  | -0.81880659 | 2.88903761  | 4.53605509  |
| C  | -5.55253029 | 1.58535433  | -0.70650947 |

|   |             |             |             |
|---|-------------|-------------|-------------|
| C | 0.29444087  | 5.07124805  | -2.27891445 |
| C | 4.63768053  | -3.35145569 | 1.28013515  |
| C | 3.15743685  | 3.63351631  | 1.34154940  |
| C | 4.76795912  | 0.79405349  | -3.10326934 |
| C | -1.89252675 | 3.23625159  | 3.72840405  |
| C | -4.63379478 | 1.97557127  | -1.67011619 |
| C | 0.77492017  | 3.81833959  | -2.62391257 |
| C | 4.02718115  | -2.39553833 | 0.47876927  |
| C | 2.50665474  | 2.53801513  | 0.79107457  |
| C | 4.06767082  | 0.82976758  | -1.90400040 |
| C | -1.96790516 | 2.77328038  | 2.42327452  |
| C | -3.27241874 | 1.87382102  | -1.42112005 |
| C | 0.39849067  | 2.69714570  | -1.89515316 |
| C | -3.82589650 | -2.60175848 | 1.17876840  |
| C | -4.32293034 | -2.66338301 | 2.47182465  |
| C | -3.52882433 | -2.29869056 | 3.54732013  |
| C | -2.22454524 | -1.88706589 | 3.31841302  |
| C | -2.77034307 | -2.26922536 | -1.51775098 |
| C | -2.37523556 | -3.24115968 | -2.43295860 |
| C | -3.12743902 | -3.48125887 | -3.57168555 |
| C | -4.28690672 | -2.75713515 | -3.80945086 |
| C | -4.67886877 | -1.78776169 | -2.89769483 |
| C | -3.92503214 | -1.53812814 | -1.76022911 |
| H | -1.19271660 | -2.75599194 | -0.41985846 |
| H | 0.26603991  | -2.17029238 | 1.90942442  |
| H | -0.13332458 | -0.69808555 | 2.50739598  |
| H | 2.11924720  | -0.89781284 | 2.83325911  |
| H | 4.76467752  | 0.14538257  | 1.55432796  |
| H | 2.30378652  | -2.03510618 | -2.22686601 |
| H | 0.91511917  | 1.03236842  | 2.31309319  |
| H | -3.40986896 | 0.55641782  | 1.69422555  |
| H | -1.61971498 | 4.20916080  | 0.36425221  |
| H | 3.15350747  | -2.61419249 | 4.22852612  |



|   |             |             |             |
|---|-------------|-------------|-------------|
| H | 5.90098190  | 2.06424475  | 2.53636837  |
| H | 3.57739305  | -2.12456560 | -4.32724810 |
| H | 1.03680992  | 1.81299806  | 4.63511992  |
| H | -5.80728292 | 0.74411041  | 1.25504005  |
| H | -0.94887286 | 6.17519522  | -0.91652250 |
| H | 4.79738855  | -4.19428396 | 3.24989271  |
| H | 4.88744307  | 4.32499695  | 2.41122818  |
| H | 5.15424776  | -0.30249965 | -4.90861034 |
| H | -0.76563656 | 3.24625182  | 5.55796576  |
| H | -6.61564779 | 1.67841029  | -0.89659470 |
| H | 0.59061056  | 5.94632578  | -2.84621286 |
| H | 5.36468744  | -4.02701902 | 0.84356946  |
| H | 2.70208454  | 4.61475372  | 1.27170169  |
| H | 5.44612885  | 1.60323358  | -3.34991908 |
| H | -2.68346953 | 3.86824322  | 4.11637163  |
| H | -4.97485781 | 2.36625528  | -2.62193942 |
| H | 1.45042145  | 3.70529246  | -3.46443033 |
| H | 4.28904963  | -2.34085846 | -0.56948870 |
| H | 1.56256187  | 2.69588518  | 0.29491100  |
| H | 4.21886110  | 1.66805553  | -1.23750222 |
| H | -2.82683539 | 3.04858017  | 1.82639015  |
| H | -2.57051635 | 2.19272661  | -2.18130064 |
| H | 0.76667517  | 1.71919560  | -2.17615652 |
| H | -4.45280027 | -2.89237785 | 0.34693426  |
| H | -5.34020185 | -3.00011230 | 2.63379669  |
| H | -3.91661024 | -2.33708572 | 4.55811691  |
| H | -1.58359945 | -1.60996020 | 4.14891768  |
| H | -1.46914279 | -3.80715132 | -2.24937105 |
| H | -2.80322099 | -4.24088001 | -4.27385187 |
| H | -4.87970066 | -2.94615602 | -4.69683170 |
| H | -5.58072758 | -1.21194041 | -3.07180977 |
| H | -4.24393749 | -0.77900356 | -1.06143129 |

SMD/PCM (CHCl<sub>3</sub>) Cartesian coordinates for **1f**:

|    |             |             |             |
|----|-------------|-------------|-------------|
| Ru | 0.42132780  | 0.48154718  | -0.09857317 |
| N  | 2.65577316  | 0.11001663  | -0.31844753 |
| C  | 3.20677352  | -0.06884081 | 1.00969732  |
| C  | 2.39431000  | 0.12363865  | 2.11449027  |
| N  | 1.04131091  | 0.57594270  | 1.91936100  |
| Cl | 1.11384201  | 2.82983208  | 0.00245040  |
| Cl | 0.30441621  | 0.56341887  | -2.50863743 |
| P  | -1.73297715 | 1.31315196  | 0.29707167  |
| P  | 0.03770216  | -1.77968919 | -0.23374771 |
| C  | -1.65212035 | 2.67623782  | 1.54529369  |
| C  | -3.20411682 | 0.45621464  | 1.04102087  |
| C  | -2.52176833 | 2.10676432  | -1.16617572 |
| C  | -0.09204923 | -2.72379398 | 1.35124409  |
| C  | 1.41153729  | -2.66906905 | -1.09297824 |
| C  | -1.38408566 | -2.45993829 | -1.20053184 |
| C  | -1.48915279 | 2.32301760  | 2.88513756  |
| C  | -4.21690559 | 1.23066950  | 1.62121832  |
| C  | -1.77814758 | 3.00725722  | -1.93145788 |
| C  | -0.70069540 | -2.10433221 | 2.44256473  |
| C  | 2.57073593  | -3.06970668 | -0.42278305 |
| C  | -1.72254443 | -3.81166649 | -1.12053478 |
| C  | -1.39640641 | 3.28889656  | 3.87583590  |
| C  | -5.34603024 | 0.64174271  | 2.16477537  |
| C  | -2.34481621 | 3.63950944  | -3.02707529 |
| C  | -0.85801953 | -2.76029015 | 3.65480280  |
| C  | 3.61704350  | -3.67630506 | -1.10636592 |
| C  | -2.77185607 | -4.32456112 | -1.86685836 |
| C  | -1.47986281 | 4.63364077  | 3.54234385  |
| C  | -5.49590635 | -0.73955500 | 2.14069605  |
| C  | -3.65321040 | 3.36128545  | -3.39874625 |
| C  | -0.39973751 | -4.06049824 | 3.80269885  |
| C  | 3.52692342  | -3.88469458 | -2.47385812 |

|   |             |             |             |
|---|-------------|-------------|-------------|
| C | -3.49981880 | -3.49319005 | -2.70827627 |
| C | -1.66250110 | 4.99607849  | 2.21628761  |
| C | -4.50923777 | -1.51834583 | 1.56185246  |
| C | -4.38946629 | 2.44292879  | -2.66630435 |
| C | 0.20301159  | -4.69691849 | 2.72737122  |
| C | 2.38841176  | -3.47517276 | -3.15488887 |
| C | -3.17133927 | -2.14935565 | -2.79399848 |
| C | -1.74502933 | 4.02646494  | 1.22626126  |
| C | -3.37912869 | -0.92096198 | 1.01533747  |
| C | -3.82935023 | 1.82241511  | -1.55716610 |
| C | 0.35271505  | -4.03776598 | 1.51579666  |
| C | 1.34331572  | -2.87011600 | -2.47352910 |
| C | -2.12160730 | -1.63497818 | -2.04438424 |
| C | 4.52208567  | -0.48593175 | 1.19108081  |
| C | 5.01124763  | -0.72517765 | 2.46253753  |
| C | 4.18920183  | -0.54498971 | 3.56835699  |
| C | 2.88499498  | -0.11844053 | 3.39307094  |
| C | 3.49066901  | 0.88935912  | -1.19969285 |
| C | 4.13508177  | 2.03879666  | -0.76101547 |
| C | 4.95917797  | 2.73987961  | -1.62789154 |
| C | 5.14793587  | 2.30386353  | -2.93247366 |
| C | 4.50264263  | 1.15482414  | -3.36604953 |
| C | 3.67447495  | 0.45084232  | -2.50482702 |
| H | 2.59437203  | -0.81362319 | -0.74256289 |
| H | 1.00258029  | 1.58721197  | 2.06665349  |
| H | 0.45447367  | 0.14601673  | 2.62384439  |
| H | -1.47590590 | 1.27739573  | 3.17548442  |
| H | -4.12574673 | 2.30883932  | 1.64999211  |
| H | -0.74696827 | 3.20105839  | -1.66588485 |
| H | -1.09546053 | -1.10302138 | 2.32617068  |
| H | 2.66095114  | -2.92510462 | 0.64723474  |
| H | -1.17245877 | -4.47790384 | -0.46858335 |
| H | -1.27235937 | 2.98938990  | 4.91047335  |

|   |             |             |             |
|---|-------------|-------------|-------------|
| H | -6.11352634 | 1.26585245  | 2.60860658  |
| H | -1.75429034 | 4.34456968  | -3.60138226 |
| H | -1.34277546 | -2.25357771 | 4.48160744  |
| H | 4.50112772  | -3.98872566 | -0.56247807 |
| H | -3.02192235 | -5.37657785 | -1.78883052 |
| H | -1.41281199 | 5.39258718  | 4.31347132  |
| H | -6.37750673 | -1.20102775 | 2.57097149  |
| H | -4.09296942 | 3.85145354  | -4.26014423 |
| H | -0.51459438 | -4.57694054 | 4.74871826  |
| H | 4.33976316  | -4.36360598 | -3.00765586 |
| H | -4.32070589 | -3.89434004 | -3.29204202 |
| H | -1.73985600 | 6.04291296  | 1.94466555  |
| H | -4.60948277 | -2.59724116 | 1.53002596  |
| H | -5.40752411 | 2.20496130  | -2.95354891 |
| H | 0.55932683  | -5.71608353 | 2.82727194  |
| H | 2.31025195  | -3.62604356 | -4.22558498 |
| H | -3.73328972 | -1.49124229 | -3.44711590 |
| H | -1.88459098 | 4.33192492  | 0.19820249  |
| H | -2.63567924 | -1.55224347 | 0.55781156  |
| H | -4.42509127 | 1.10968304  | -1.00292659 |
| H | 0.82858449  | -4.56003523 | 0.69603491  |
| H | 0.46662626  | -2.54919219 | -3.02040339 |
| H | -1.85486686 | -0.58972585 | -2.12965608 |
| H | 5.15746641  | -0.62795871 | 0.32522318  |
| H | 6.03368807  | -1.06000245 | 2.59026670  |
| H | 4.56641865  | -0.73546112 | 4.56607246  |
| H | 2.23611188  | 0.03306591  | 4.24922609  |
| H | 3.99449348  | 2.38591194  | 0.25291011  |
| H | 5.45735884  | 3.63652802  | -1.27700889 |
| H | 5.79681540  | 2.85377097  | -3.60422468 |
| H | 4.64146233  | 0.79938662  | -4.38077450 |
| H | 3.16291809  | -0.44010261 | -2.84802246 |

SMD/PCM (CHCl<sub>3</sub>) Cartesian coordinates for **1g**:

|    |             |             |             |
|----|-------------|-------------|-------------|
| Ru | -0.09578462 | 0.09146255  | 0.55363518  |
| Cl | 0.73204684  | 0.45404440  | 2.76163888  |
| Cl | -1.46329439 | 0.06873019  | -1.40318394 |
| P  | -0.34019518 | -2.17041469 | 0.89793754  |
| P  | 1.84679747  | 0.25892782  | -0.49965262 |
| C  | -0.34199297 | -3.42689943 | -0.43580997 |
| C  | 0.62061304  | -4.43453121 | -0.47319046 |
| H  | 1.36921453  | -4.50171900 | 0.30643615  |
| C  | 0.62709415  | -5.36900425 | -1.50008130 |
| H  | 1.38175356  | -6.14724064 | -1.51023996 |
| C  | -0.32860178 | -5.31204939 | -2.50290561 |
| H  | -0.32805848 | -6.04706383 | -3.29974508 |
| C  | -1.28496909 | -4.30587482 | -2.48190737 |
| H  | -2.03332901 | -4.24844599 | -3.26428437 |
| C  | -1.28830886 | -3.36672735 | -1.46243978 |
| H  | -2.02622294 | -2.57529402 | -1.46977520 |
| C  | -2.06881475 | -2.19690418 | 1.53140974  |
| C  | -2.40913415 | -1.23134482 | 2.48258114  |
| H  | -1.65790737 | -0.53403509 | 2.83960938  |
| C  | -3.69198656 | -1.17290950 | 3.00753808  |
| H  | -3.93476462 | -0.41623574 | 3.74435973  |
| C  | -4.65522718 | -2.08171654 | 2.59607387  |
| H  | -5.65829563 | -2.03655624 | 3.00440669  |
| C  | -4.32438803 | -3.05401683 | 1.66319132  |
| H  | -5.06627321 | -3.77759409 | 1.34456146  |
| C  | -3.04258871 | -3.11284399 | 1.13503480  |
| H  | -2.80741978 | -3.88718224 | 0.41724089  |
| C  | 0.54479992  | -3.06709838 | 2.23192143  |
| C  | 1.84624195  | -2.72919774 | 2.58513713  |
| H  | 2.33075047  | -1.88979876 | 2.10804629  |
| C  | 2.52067471  | -3.45225239 | 3.56095266  |
| H  | 3.53413105  | -3.17580438 | 3.82759094  |

|   |             |             |             |
|---|-------------|-------------|-------------|
| C | 1.89929926  | -4.51549387 | 4.19731331  |
| H | 2.42523360  | -5.07575321 | 4.96212196  |
| C | 0.59608948  | -4.85494518 | 3.85637522  |
| H | 0.09978851  | -5.68156481 | 4.35205889  |
| C | -0.07541552 | -4.13651037 | 2.88040733  |
| H | -1.09159195 | -4.41287136 | 2.62567830  |
| C | 2.11186576  | -0.43285105 | -2.18197036 |
| C | 1.25826812  | -1.36421347 | -2.75316811 |
| H | 0.38690409  | -1.69168699 | -2.20938206 |
| C | 1.50240803  | -1.85615945 | -4.03059006 |
| H | 0.82015061  | -2.57770109 | -4.46443892 |
| C | 2.60554814  | -1.42223489 | -4.74629164 |
| H | 2.79494548  | -1.80409586 | -5.74320412 |
| C | 3.46809697  | -0.48892549 | -4.18220091 |
| H | 4.33290577  | -0.14103903 | -4.73568869 |
| C | 3.22188234  | 0.00373148  | -2.91254854 |
| H | 3.89970708  | 0.73607582  | -2.48937368 |
| C | 2.16293526  | 2.02997398  | -0.91015089 |
| C | 1.34151149  | 2.58338308  | -1.89888740 |
| H | 0.59275889  | 1.96346319  | -2.38192415 |
| C | 1.47577024  | 3.90932083  | -2.27573729 |
| H | 0.82975858  | 4.31762409  | -3.04430246 |
| C | 2.43767452  | 4.71007204  | -1.67171240 |
| H | 2.54593897  | 5.74786139  | -1.96485484 |
| C | 3.26256251  | 4.17021322  | -0.69863421 |
| H | 4.02481079  | 4.78218079  | -0.22995660 |
| C | 3.12838531  | 2.83904433  | -0.31930190 |
| H | 3.80269551  | 2.43891239  | 0.42490765  |
| C | 3.36255217  | -0.30981210 | 0.36407748  |
| C | 4.10603285  | -1.38107824 | -0.13321581 |
| H | 3.80281496  | -1.87914085 | -1.04453921 |
| C | 5.24112701  | -1.82593608 | 0.52977830  |
| H | 5.80186224  | -2.66142082 | 0.12640497  |

|   |             |             |             |
|---|-------------|-------------|-------------|
| C | 5.65696239  | -1.20403111 | 1.69703615  |
| H | 6.54851961  | -1.54629755 | 2.21009660  |
| C | 4.91665268  | -0.14838316 | 2.21100354  |
| H | 5.22186947  | 0.33451387  | 3.13228345  |
| C | 3.77272868  | 0.28603402  | 1.55944729  |
| H | 3.17890382  | 1.07124388  | 2.00516987  |
| N | -2.42124057 | 3.11629319  | -1.12167668 |
| C | -2.73052931 | 3.14044523  | 0.24114430  |
| C | -1.76029789 | 2.69529819  | 1.15229189  |
| N | -0.48129842 | 2.27549529  | 0.66643733  |
| C | -3.96008730 | 3.57305074  | 0.73545659  |
| C | -4.21796227 | 3.58157849  | 2.09596753  |
| C | -3.25200176 | 3.14100718  | 2.98947001  |
| C | -2.02936053 | 2.69543052  | 2.51427269  |
| C | -2.90041924 | 3.98553753  | -2.08831215 |
| C | -3.26315355 | 5.30585289  | -1.80367374 |
| C | -3.67372513 | 6.15381479  | -2.82041287 |
| C | -3.72361875 | 5.71956444  | -4.13840151 |
| C | -3.35649300 | 4.41140604  | -4.42605639 |
| C | -2.95544553 | 3.55132675  | -3.41796207 |
| H | -2.11734700 | 2.20435596  | -1.45653188 |
| H | 0.24590838  | 2.56811237  | 1.31190729  |
| H | -0.30649897 | 2.71894503  | -0.23184629 |
| H | -4.72012568 | 3.90183449  | 0.03780562  |
| H | -5.18184948 | 3.92252612  | 2.45573163  |
| H | -3.44653630 | 3.14344716  | 4.05532169  |
| H | -1.26369560 | 2.34754872  | 3.19742632  |
| H | -3.20949411 | 5.67508268  | -0.78734857 |
| H | -3.94839811 | 7.17405748  | -2.57523370 |
| H | -4.04401159 | 6.38873863  | -4.92791319 |
| H | -3.38868403 | 4.04948282  | -5.44787025 |
| H | -2.67717505 | 2.52976179  | -3.65517998 |

SMD/PCM (toluene) Cartesian coordinates for 1:

|    |             |             |             |
|----|-------------|-------------|-------------|
| Ru | -0.14413518 | 0.70574862  | 0.08216618  |
| Cl | -0.08009372 | 1.10409784  | 2.47880650  |
| Cl | -0.27785513 | 1.02404821  | -2.30547953 |
| P  | -0.78878319 | -1.54038560 | 0.29441857  |
| P  | 2.12285495  | 0.35792693  | -0.21219254 |
| C  | -1.19942927 | -2.49919796 | -1.22664487 |
| C  | -0.93024558 | -3.85991406 | -1.37716663 |
| H  | -0.40628958 | -4.40132332 | -0.60091853 |
| C  | -1.33883369 | -4.54199266 | -2.51462173 |
| H  | -1.11706960 | -5.59860945 | -2.61270428 |
| C  | -2.03368545 | -3.87829828 | -3.51503038 |
| H  | -2.35320187 | -4.41160059 | -4.40312767 |
| C  | -2.31856847 | -2.52861381 | -3.36982822 |
| H  | -2.86241460 | -1.99949527 | -4.14380741 |
| C  | -1.90339959 | -1.84392655 | -2.23705792 |
| H  | -2.11628294 | -0.78782529 | -2.14414525 |
| C  | -2.36988568 | -1.79363227 | 1.23368979  |
| C  | -2.58545732 | -1.10481203 | 2.42953968  |
| H  | -1.83028042 | -0.41676444 | 2.79401374  |
| C  | -3.74799776 | -1.29415989 | 3.16514945  |
| H  | -3.88879228 | -0.74568653 | 4.08971786  |
| C  | -4.71939373 | -2.17924833 | 2.72169375  |
| H  | -5.62923813 | -2.32595563 | 3.29224563  |
| C  | -4.51240253 | -2.87763929 | 1.54141176  |
| H  | -5.26089907 | -3.57548237 | 1.18341792  |
| C  | -3.35046959 | -2.68872523 | 0.80585974  |
| H  | -3.22104144 | -3.24253750 | -0.11380012 |
| C  | 0.29773563  | -2.72819519 | 1.19582152  |
| C  | 1.46395051  | -3.18918562 | 0.58362633  |
| H  | 1.73288691  | -2.84210920 | -0.40584081 |
| C  | 2.28616166  | -4.11029625 | 1.21125364  |
| H  | 3.18112803  | -4.45698452 | 0.70821559  |



|   |             |             |             |
|---|-------------|-------------|-------------|
| C | 1.97041976  | -4.57600498 | 2.47926307  |
| H | 2.61447644  | -5.29389048 | 2.97380066  |
| C | 0.82702357  | -4.11154604 | 3.10864115  |
| H | 0.56891859  | -4.46348572 | 4.10101604  |
| C | -0.00515213 | -3.20151615 | 2.47024488  |
| H | -0.90235609 | -2.87280536 | 2.97647166  |
| C | 2.71942163  | -0.36475512 | -1.80071521 |
| C | 1.94636095  | -1.31212211 | -2.46464515 |
| H | 0.95597661  | -1.54484606 | -2.10049248 |
| C | 2.40781522  | -1.93346906 | -3.61578584 |
| H | 1.78312373  | -2.66608906 | -4.11350965 |
| C | 3.64916158  | -1.60185039 | -4.13706017 |
| H | 4.00858593  | -2.08038139 | -5.04084539 |
| C | 4.42119169  | -0.64017469 | -3.50204659 |
| H | 5.38760185  | -0.36123854 | -3.90633965 |
| C | 3.95988321  | -0.02709701 | -2.34608769 |
| H | 4.57660627  | 0.72668082  | -1.87306643 |
| C | 2.95917702  | 2.00309372  | -0.25336346 |
| C | 2.90067816  | 2.78458095  | -1.41033459 |
| H | 2.42515278  | 2.38982987  | -2.30109215 |
| C | 3.43920517  | 4.06221342  | -1.42906463 |
| H | 3.39147115  | 4.64978266  | -2.33884358 |
| C | 4.03453970  | 4.58720875  | -0.28957561 |
| H | 4.45596790  | 5.58566999  | -0.30491024 |
| C | 4.08595133  | 3.82567430  | 0.86799288  |
| H | 4.54710674  | 4.22559834  | 1.76376450  |
| C | 3.55348253  | 2.54220915  | 0.88639498  |
| H | 3.60573435  | 1.95872927  | 1.79743266  |
| C | 3.19567442  | -0.50979370 | 1.02032220  |
| C | 4.45632315  | -1.00571370 | 0.68384856  |
| H | 4.80809402  | -0.96653372 | -0.33746767 |
| C | 5.27925682  | -1.56852341 | 1.64694452  |
| H | 6.25393152  | -1.94765425 | 1.36078095  |

|   |             |             |             |
|---|-------------|-------------|-------------|
| C | 4.85865688  | -1.64834774 | 2.96676278  |
| H | 5.50370073  | -2.08674240 | 3.71987343  |
| C | 3.60360861  | -1.17193079 | 3.30925822  |
| H | 3.25542593  | -1.23835576 | 4.33373928  |
| C | 2.77697849  | -0.61219311 | 2.34477234  |
| H | 1.79812825  | -0.24542837 | 2.62301970  |
| N | -2.28452182 | 1.52684164  | 0.33878386  |
| C | -2.18754649 | 2.93506026  | 0.68216175  |
| C | -0.97627223 | 3.58157396  | 0.52624047  |
| N | 0.13866608  | 2.83076382  | 0.02646570  |
| C | -3.28530598 | 3.63034582  | 1.17330718  |
| C | -3.16438746 | 4.96533060  | 1.51830769  |
| C | -1.94512296 | 5.61319828  | 1.36666894  |
| C | -0.85378397 | 4.92208719  | 0.86974460  |
| C | -3.35235023 | 1.28521132  | -0.60279846 |
| C | -3.36285114 | 1.94054532  | -1.82923782 |
| C | -4.39642191 | 1.71564889  | -2.72318625 |
| C | -5.42753983 | 0.84066653  | -2.40672541 |
| C | -5.42308474 | 0.20200330  | -1.17724288 |
| C | -4.39486885 | 0.42954549  | -0.27283618 |
| H | -2.49244475 | 1.01848519  | 1.19523776  |
| H | 0.98141086  | 3.10100174  | 0.52241677  |
| H | 0.29102072  | 3.02162576  | -0.96346575 |
| H | -4.23423433 | 3.11894679  | 1.28584421  |
| H | -4.02070665 | 5.49996614  | 1.91150093  |
| H | -1.84533024 | 6.65727472  | 1.63774586  |
| H | 0.10375765  | 5.41720200  | 0.74957663  |
| H | -2.55688477 | 2.61241031  | -2.08670712 |
| H | -4.39163685 | 2.22728825  | -3.67864180 |
| H | -6.23192406 | 0.66581720  | -3.11142635 |
| H | -6.22740746 | -0.47256243 | -0.90788519 |
| H | -4.40965462 | -0.05928119 | 0.69315147  |

SMD/PCM (toluene) Cartesian coordinates for **1g**:

|    |             |             |             |
|----|-------------|-------------|-------------|
| Ru | -0.09641241 | 0.08697950  | 0.55200797  |
| Cl | 0.73218256  | 0.44751087  | 2.75902009  |
| Cl | -1.45737290 | 0.06891184  | -1.40858150 |
| P  | -0.34055293 | -2.17422390 | 0.89573729  |
| P  | 1.84355474  | 0.26017064  | -0.50151998 |
| C  | -0.34763685 | -3.43145847 | -0.43761703 |
| C  | 0.60625845  | -4.44726324 | -0.47211730 |
| H  | 1.35009754  | -4.52137947 | 0.31130254  |
| C  | 0.60962319  | -5.37974548 | -1.50050211 |
| H  | 1.35777986  | -6.16402197 | -1.50862455 |
| C  | -0.34167469 | -5.31391335 | -2.50658560 |
| H  | -0.34398416 | -6.04793882 | -3.30413675 |
| C  | -1.29026604 | -4.30059242 | -2.48754787 |
| H  | -2.03535748 | -4.23624039 | -3.27226639 |
| C  | -1.28989816 | -3.36228347 | -1.46747315 |
| H  | -2.02008200 | -2.56364679 | -1.47711754 |
| C  | -2.06848478 | -2.19708443 | 1.53013754  |
| C  | -2.40511894 | -1.23215878 | 2.48297381  |
| H  | -1.65054083 | -0.54022455 | 2.84324312  |
| C  | -3.68860054 | -1.16821599 | 3.00495839  |
| H  | -3.92906094 | -0.40994081 | 3.74065256  |
| C  | -4.65512753 | -2.07166386 | 2.59076262  |
| H  | -5.65877676 | -2.02183962 | 2.99672103  |
| C  | -4.32733107 | -3.04442787 | 1.65770650  |
| H  | -5.07215500 | -3.76369095 | 1.33675623  |
| C  | -3.04568672 | -3.10780120 | 1.13059223  |
| H  | -2.81266117 | -3.88072300 | 0.41063541  |
| C  | 0.54521501  | -3.06979656 | 2.22927713  |
| C  | 1.84763050  | -2.73240709 | 2.57859826  |
| H  | 2.33207488  | -1.89540434 | 2.09740305  |
| C  | 2.52187634  | -3.45093012 | 3.55739737  |
| H  | 3.53549242  | -3.17364311 | 3.82171392  |

|   |             |             |             |
|---|-------------|-------------|-------------|
| C | 1.89902484  | -4.50857735 | 4.20079184  |
| H | 2.42430878  | -5.06460524 | 4.96892548  |
| C | 0.59512198  | -4.84766865 | 3.86351776  |
| H | 0.09771956  | -5.66957617 | 4.36551905  |
| C | -0.07646166 | -4.13383627 | 2.88464856  |
| H | -1.09410036 | -4.40777779 | 2.63359594  |
| C | 2.11210799  | -0.43173000 | -2.18319917 |
| C | 1.26248860  | -1.36765671 | -2.75246525 |
| H | 0.39146113  | -1.69579744 | -2.20868421 |
| C | 1.50980425  | -1.86234820 | -4.02790022 |
| H | 0.83048999  | -2.58769131 | -4.45956182 |
| C | 2.61128592  | -1.42584348 | -4.74389362 |
| H | 2.80263019  | -1.80936754 | -5.73961020 |
| C | 3.46913433  | -0.48704308 | -4.18240309 |
| H | 4.33209705  | -0.13627237 | -4.73658848 |
| C | 3.22024989  | 0.00795807  | -2.91448903 |
| H | 3.89395618  | 0.74472481  | -2.49271655 |
| C | 2.15453553  | 2.03205347  | -0.91361600 |
| C | 1.32356465  | 2.58542657  | -1.89428389 |
| H | 0.57041544  | 1.96487188  | -2.36965823 |
| C | 1.45233655  | 3.91213727  | -2.26990962 |
| H | 0.79683203  | 4.32084417  | -3.03002191 |
| C | 2.41898417  | 4.71289730  | -1.67411685 |
| H | 2.52266955  | 5.75122786  | -1.96636760 |
| C | 3.25358105  | 4.17293072  | -0.70971072 |
| H | 4.01909399  | 4.78548241  | -0.24747778 |
| C | 3.12434340  | 2.84141135  | -0.33055735 |
| H | 3.80471492  | 2.44029927  | 0.40768424  |
| C | 3.36317205  | -0.30083621 | 0.36177620  |
| C | 4.11430550  | -1.36624837 | -0.13623025 |
| H | 3.81534243  | -1.86386168 | -1.04913700 |
| C | 5.25102520  | -1.80490088 | 0.52782762  |
| H | 5.81785488  | -2.63568115 | 0.12379164  |

|   |             |             |             |
|---|-------------|-------------|-------------|
| C | 5.66049957  | -1.18303359 | 1.69703233  |
| H | 6.55311298  | -1.52062976 | 2.21103024  |
| C | 4.91238499  | -0.13372646 | 2.21195459  |
| H | 5.21174526  | 0.34831554  | 3.13537359  |
| C | 3.76741242  | 0.29524437  | 1.55897808  |
| H | 3.16688895  | 1.07494462  | 2.00547075  |
| N | -2.41233349 | 3.11436939  | -1.11037612 |
| C | -2.72719908 | 3.14182997  | 0.25066525  |
| C | -1.76261914 | 2.68942046  | 1.16402829  |
| N | -0.48397711 | 2.26808000  | 0.67925400  |
| C | -3.95445013 | 3.58326316  | 0.74215013  |
| C | -4.21672869 | 3.58797026  | 2.10158730  |
| C | -3.25770640 | 3.13644505  | 2.99679065  |
| C | -2.03604341 | 2.68504333  | 2.52496648  |
| C | -2.88668990 | 3.98134351  | -2.08132434 |
| C | -3.24267483 | 5.30475426  | -1.80351138 |
| C | -3.65004778 | 6.14875698  | -2.82437062 |
| C | -3.70348620 | 5.70769835  | -4.13951540 |
| C | -3.34238839 | 4.39671087  | -4.42044115 |
| C | -2.94432139 | 3.54044867  | -3.40847683 |
| H | -2.11528683 | 2.19858313  | -1.44203806 |
| H | 0.24109252  | 2.54474115  | 1.33395040  |
| H | -0.30308270 | 2.72146106  | -0.21285917 |
| H | -4.70936394 | 3.91923213  | 0.04260144  |
| H | -5.17911291 | 3.93469357  | 2.45931816  |
| H | -3.45615149 | 3.13653374  | 4.06176519  |
| H | -1.27431667 | 2.33026958  | 3.20906591  |
| H | -3.18667221 | 5.67812729  | -0.78892821 |
| H | -3.91997123 | 7.17136049  | -2.58467412 |
| H | -4.02186966 | 6.37389612  | -4.93204165 |
| H | -3.37758470 | 4.02950621  | -5.44006968 |
| H | -2.67222333 | 2.51582980  | -3.63898039 |

## 9. References

1. P.S. Hallman, T.A. Stephenson, G. Wilkinson, *Inorg. Synth.* 12 (1970) 237-240.
2. C. Adamo, V. Barone, *J. Chem. Phys.* 110 (1999) 6158-6170.
3. F. Weigend, R. Ahlrichs, *Phys. Chem. Chem. Phys.* 7 (2005) 3297-3305.
4. D. Rappoport, F. Furche, *J. Chem. Phys.* 133 (2010) 134105.
5. D. Andrae, U. Häußermann, M. Dolg, H. Stoll, H. Preuß, *Theor. Chim. Acta* 77 (1990)123-141.
6. The def2-TZVPPD basis set and Stuttgart pseudopotentials were downloaded from the Basis Set Exchange (BSE) website <https://www.basissetexchange.org/>.
7. B.P. Pritchard, D. Altarawy, B. Didier, T.D. Gibbsom, T.L. Windus, *J. Chem. Inf. Model.* 59 (2019) 4814-4820.
8. D. Feller, *J. Comput. Chem.* 17 (1996) 1571-1586.
9. K.L. Schuchardt, B.T. Didier, T. Elsethagen, L. Sun, V. Gurumoorthi, J. Chase, J. Li, T.L. Windus, *J. Chem. Inf. Model.* 47 (2007) 1045-1052.
10. *Statistical Mechanics*, D.A. McQuarrie, J. Woods, Eds.; Harper & Row: New York, 1976.
11. M.W. Schmidt, K.K. Baldrige, J.A. Boatz, S.T. Elbert, M.S. Gordon, J.H. Jensen, S. Koseki, N. Matsunaga, K.A. Nguyen, S.J. Su, T.L. Windus, M. Dupuis, J.A. Montgomery, *J. Comput. Chem.* 14 (1993) 1347-1363.
12. M.S. Gordon, M.W. Schmidt, Chapter 41, pp 1167-1189, in *Theory and Applications of Computational Chemistry, the first forty years*, C.E. Dykstra, G. Frenking, K.S. Kim, G.E. Scuseria, Eds., Elsevier, Amsterdam, 2005.

13. G.M.J. Barca, C. Bertoni, L. Carrington, D.D.N. De Silva, J.E. Deustua, D.G. Fedorov, J.R. Gour, A.O. Gunina, E. Guidez, T. Harville, S. Irle, J. Ivancic, K. Kowalski, S.S. Leang, H. Li, W. Li, J.J. Lutz, I. Magoulas, J. Mato, V. Mironov, H. Nakata, B. Q. Pham, P. Piecuch, D. Poole, S.R. Pruitt, A.P. Rendell, L.B. Roskop, K. Ruedenberg, T. Sattasathuchana, M.W. Schmidt, J. Shen, L. Slipchenko, M. Sosonkina, V. Sundriyal, A. Tiwari, J.L.G. Vallejo, B. Westheimer, M. Włoch, P. Xu, F. Zahariev, M.S. Gordon, *J. Chem. Phys.* 152 (2020) 154102.
14. A.V.Marenich, C.J.Cramer, D.G.Truhlar, "Universal solution model based on solute electron density and on a continuum model of the solvent defined by the bulk dielectric constant and atomic surface tensions" *J. Phys. Chem. B* 113, (2009) 6378-6396.
15. H.Li, C.S.Pomelli, J.H.Jensen, "Continuum solvation of large molecules described by QM/MM: a semi-iterative implementation of the PCM/EFP interface", *Theoret. Chim. Acta* 109, 2003, 71-84.
16. H.Li, J.H.Jensen "Improving the efficiency and convergence of geometry optimization with the polarizable continuum model: new energy gradients and molecular surface tessellation", *J. Comput. Chem.* 25, 2004, 1449-1462.
17. *SAINTE* and *SADABS*, Bruker AXS Inc. Madison, WI, 2017.
18. *SHELXT*, G. M. Sheldrick, *Acta Crystallog. Sect. A* 71, 2015, 3.
19. *SHELXL*, G. M. Sheldrick, *Acta Crystallog. Sect. C* 71, 2015, 3.
